1 **Re-programming of *Pseudomonas syringae* pv.**  
2 ***actinidiae* gene expression during early stages of**  
3 **infection of kiwifruit**

4

5

6 Peter A. McAtee<sup>1</sup>, Lara Brian<sup>1</sup>, Ben Curran<sup>1,2</sup>, Otto van der Linden<sup>1</sup>, Niels J.  
7 Nieuwenhuizen<sup>1</sup>, Xiuyin Chen<sup>1</sup>, Rebecca Henry-Kirk<sup>1</sup>, Erin A. Stroud<sup>1,2</sup>, Simona  
8 Nardozza<sup>1</sup>, Jay Jayaraman<sup>1,3</sup>, Erik H. A. Rikkerink<sup>1</sup>, Cris G. Print<sup>4</sup>, Andrew C. Allan<sup>1,2</sup>,  
9 Matthew D. Templeton<sup>1,2,3,\*</sup>

10

11

12

13

14 \*Correspondence: Matthew D. Templeton, [matt.templeton@plantandfood.co.nz](mailto:matt.templeton@plantandfood.co.nz), The New Zealand Institute  
15 for Plant & Food Research Limited, Auckland, New Zealand

16

17

18

19 **Running Title: Re-programming of *Psa* gene expression during infection**

20

21

22

23

24 **Keywords: RNA-seq, type III effectors, pathogenicity, secreted proteins, RT-qPCR**

25

26

27 Email addresses: PM : [peter.mcatee@plantandfood.co.nz](mailto:peter.mcatee@plantandfood.co.nz); LB : [larabrian@hotmail.com](mailto:larabrian@hotmail.com); BC :

28 [b.curran@auckland.ac.nz](mailto:b.curran@auckland.ac.nz); OvdL : [ottovanderlinden1@hotmail.com](mailto:ottovanderlinden1@hotmail.com); NN :

29 [niels.nieuwenhuizen@plantandfood.co.nz](mailto:niels.nieuwenhuizen@plantandfood.co.nz); XC : [xiuyin.chen@plantandfood.co.nz](mailto:xiuyin.chen@plantandfood.co.nz); RH-K :

30 [rebecca.kirk@plantandfood.co.nz](mailto:rebecca.kirk@plantandfood.co.nz); ES : [erin.stroud@plantandfood.co.nz](mailto:erin.stroud@plantandfood.co.nz); SN :

31 [simona.nardozza@plantandfood.co.nz](mailto:simona.nardozza@plantandfood.co.nz); JJ : [jay.jayaraman@plantandfood.co.nz](mailto:jay.jayaraman@plantandfood.co.nz); EHAR :

32 [erik.rikkerink@plantandfood.co.nz](mailto:erik.rikkerink@plantandfood.co.nz); CP : [c.print@auckland.ac.nz](mailto:c.print@auckland.ac.nz); AA : [andrew.allan@plantandfood.co.nz](mailto:andrew.allan@plantandfood.co.nz);

33 MDT : [matt.templeton@plantandfood.co.nz](mailto:matt.templeton@plantandfood.co.nz).

34

35

36 **Abstract**

37

38 **Background:** *Pseudomonas syringae* is a widespread bacterial species complex that  
39 includes a number of significant plant pathogens. Amongst these, *P. syringae* pv. *actinidiae*  
40 (*Psa*) initiated a worldwide pandemic in 2008 on cultivars of *Actinidia chinensis* var.  
41 *chinensis*. To gain information about the expression of genes involved in pathogenicity we  
42 have carried out transcriptome analysis of *Psa* during the early stages of kiwifruit infection.

43

44 **Results:** Gene expression in *Psa* was investigated during the first five days after infection  
45 of kiwifruit plantlets, using RNA-seq. Principal component and heatmap analyses showed  
46 distinct phases of gene expression during the time course of infection. The first phase was  
47 an immediate transient peak of induction around three hours post inoculation (HPI) that  
48 included genes that code for a Type VI Secretion System and nutrient acquisition  
49 (particularly phosphate). This was followed by a significant commitment, between 3 and  
50 24 HPI, to the induction of genes encoding the Type III Secretion System (T3SS) and Type  
51 III Secreted Effectors (T3SE). Expression of these genes collectively accounted for 6.3%  
52 of the bacterial transcriptome at this stage. There was considerable variation in the  
53 expression levels of individual T3SEs but all followed the same temporal expression pattern,  
54 with the exception of HopAS1, which peaked later in expression at 48 HPI. As infection  
55 progressed over the time course of five days, there was an increase in the expression of  
56 genes with roles in sugar, amino acid and sulfur transport and the production of alginate and  
57 colanic acid. These are both polymers that are major constituents of extracellular

58 polysaccharide substances (EPS) and are involved in biofilm production. Reverse  
59 transcription-quantitative PCR (RT-qPCR) on an independent infection time course  
60 experiment showed that the expression profile of selected bacterial genes at each infection  
61 phase correlated well with the RNA-seq data.

62

63 **Conclusions:** The results from this study indicate that there is a complex remodeling of the  
64 transcriptome during the early stages of infection, with at least three distinct phases of  
65 coordinated gene expression. These include genes induced during the immediate contact  
66 with the host, those involved in the initiation of infection, and finally those responsible for  
67 nutrient acquisition.

68

## 69 **Background**

70

71 *Pseudomonas syringae* is a widespread bacterial species complex that comprises plant  
72 epiphytes and pathogens, as well as being found in non-plant environments such as  
73 waterways [1, 2]. Each pathovar of *P. syringae* has a relatively narrow host range related  
74 to the specific effector and secondary metabolite profile encoded by its accessory genome.  
75 Effectors are proteins that are secreted into plant cells via the Type III Secretion system  
76 (T3SS) that function to repress the host defense response [3]. The kiwifruit vine (*Actinidia*  
77 Lindl spp.) disease pathogen *P. syringae* pv. *actinidiae* (*Psa*) was first identified in Japan in  
78 1984 [4, 5] and was subsequently found in Korea in the 1990s [6]. Both these strains  
79 caused canker symptoms, but did not spread from their country of origin. In 2008, a  
80 particularly virulent canker-causing strain of *Psa* was reported in Italy and it quickly  
81 decimated plantings of *A. chinensis* var. *chinensis* cultivars, particularly 'Hort16A',  
82 'Hongyang' and 'Jin Tao' [7]. This strain was found in other kiwifruit-growing regions  
83 including New Zealand, Chile and China by 2010 [8].

84 Whole genome sequence analysis was carried out on over 25 strains of *Psa*  
85 representing isolates from all locations where *Psa* had been reported. Phylogenetic  
86 analysis of the core genome indicated that the canker-causing isolates formed three clades.  
87 The first clade comprised the initial isolates from Japan, the second those collected in the  
88 1990s from Korea and the third the pandemic outbreak strains from Italy, New Zealand,  
89 Chile and China [9-11]. Isolates within these clades are designated as biovars [12]. The  
90 core genome of isolates from the pandemic clade (biovar 3) differed by very few Single

91 Nucleotide Polymorphisms (SNPs) suggesting that this is a clonal population; however, the  
92 isolates from New Zealand, Italy, Chile and China each possessed a different member of a  
93 family of integrative conjugative elements [9-11]. More recently a comprehensive  
94 phylogenetic analysis of eighty *Psa* isolates has shown the origin of the pandemic strains to  
95 be China [13]. Two new biovars of *Psa* have been recently discovered in Japan [14, 15],  
96 and thus the location of the source population of *Psa* biovars has yet to be conclusively  
97 determined.

98 The three canker-causing biovars each had a surprisingly varied accessory genome with  
99 different complements of genes encoding effectors and toxins [11, 16]. Many of these  
100 genes are encoded on putative mobile genetic elements. While bioinformatic analysis has  
101 identified genes that might be unique to the recent outbreak clade, little is known about the  
102 expression of these and other genes that might have a crucial role in pathogenicity.  
103 Surprisingly there are few RNA-seq data on the early stages of infection of plants by  
104 pathogenic bacteria, including *P. syringae*.

105 Several transcriptome studies have been carried out on different *P. syringae* pathovars  
106 [17, 18]. The most comprehensive *in planta* analysis has been of *P. syringae* pv. *syringae*  
107 (*Pss*) B728a. This pathovar is a particularly successful epiphyte as well as a pathogen of  
108 bean (*Phaseolus vulgaris* L.). Global analysis of the transcriptome as an epiphyte,  
109 pathogen, and under various stress conditions was carried out using a microarray  
110 covering >5000 coding sequences [19, 20]. The transcript profiles indicated that success  
111 as an epiphyte is enabled by flagellar and swarming motility based on surfactant production,  
112 chemosensing, and chemotaxis. This could indicate active relocation primarily on the leaf

113 surface. Occupation of an epiphytic niche was accompanied by high transcript levels for  
114 phenylalanine degradation, which may help to counteract phenylpropanoid-based plant  
115 defenses [19]. In contrast, intercellular or apoplastic colonization led to the high-level  
116 expression of genes for  $\gamma$ -aminobutyric acid (GABA) metabolism (degradation of GABA  
117 would attenuate GABA repression of virulence) and the synthesis of phytotoxins, syringolin  
118 A and two additional secondary metabolites. Perhaps surprisingly the T3SS and T3SEs  
119 were not found to be strongly induced in the apoplast [19]. Subsequent analysis of several  
120 regulatory mutants illustrated a central role for GacS, SalA, RpoN, and AlgU in global  
121 regulation in *Pss* B728a *in planta* and a high degree of plasticity in these transcriptional  
122 regulators' responses to distinct environmental signals [20].

123 More recently a comprehensive analysis of gene expression by *P. syringae* pv. *tomato*  
124 DC3000 (*Pto*) has been carried out on wild-type Arabidopsis and several defense gene  
125 mutants [21]. T3SS and T3SEs genes were upregulated *in planta*, as were transporter  
126 genes. A key finding was that Arabidopsis perturbs iron homeostasis in *Pto* [21].

127 To gain additional information about the expression of genes involved in pathogenicity,  
128 we have carried out transcriptome analysis of *Psa* grown *in vitro* on minimal media and *in*  
129 *planta* during the early stages of kiwifruit infection, using an RNA-seq approach. Our  
130 analysis showed that there are at least three distinct coordinated phases of gene expression  
131 and has resulted in the discovery of several uncharacterized genes that may have a role in  
132 pathogenicity.

133

## 134 **Results**

135

### 136 **Infection assay and RNA-seq time course**

137 Infection assays of kiwifruit tissue-cultured plantlets with *Psa* were performed in flood-  
138 inoculated tissue culture vessels under sterile conditions. This method gave consistent and  
139 reproducible infection rates, with water-soaked lesions on the underside of leaves  
140 progressively developing from day 5, necrotic lesions appearing from day 10 and plant death  
141 from four weeks (Additional file 1). A time course was carried out to assess the rate of  
142 infection and to measure and distinguish the relative populations of apoplastic and leaf  
143 surface-colonizing (epiphytic) bacteria. Bacterial counts in the apoplast (surface sterilized  
144 samples) rose rapidly during the first six days post inoculation and reached a plateau at  
145 approximately  $10^8$  colony-forming units (CFU)/cm<sup>2</sup> thereafter (Figure 1). Total bacterial  
146 counts (non-surface sterilized samples), which included both apoplastic and epiphytic  
147 bacteria, rose from  $10^5$  to  $10^8$  CFU/cm<sup>2</sup> during the time course. The results suggest that  
148 for the first two days of infection, the majority of live cells were located epiphytically on the  
149 surface of the plant, but that the proportion of apoplastic colonizing bacteria progressively  
150 rose from days 2 to 6 so that the apoplast became the predominant niche from that time on.

151 A time course of five days (120 hours) was selected for the RNA-seq analysis, with a  
152 focus on very early time points to identify genes induced in the first stages of contact with  
153 the plant surface and subsequent infection. It was postulated that key genes responsible  
154 for the initiation of infection would be induced at the early stages of contact with the plant  
155 surface. Obtaining significant numbers of bacterial reads from infected plants at the early

156 stages of infection is extremely challenging. For this reason, leaves were not surface  
157 sterilized before RNA extraction.

158

### 159 **RNA-seq expression profile**

160 Trimmed reads were mapped onto the complete *Psa* ICMP 18884 genome (CP011972.2  
161 and CP011973) [22]. An average of 50,000-200,000 reads mapped to the *Psa* genome for  
162 each time point. This represents between 0.2 and 0.6% of the total reads per sample.  
163 The 27 control uninfected treatments showed 50-350 reads mapping to the *Psa* genome  
164 (0.0012-0.0002% of the total reads). A principal component analysis (PCA) was carried  
165 out on the inoculated samples to assess overall similarity, and the three biological replicates  
166 showed little variance within each time point (Figure 2A). PCA also demonstrated that each  
167 of the *Psa*-infected tissue samples belonged to one of three major phases that closely  
168 aligned to the post inoculation period and that were distinct from the *in vitro* control. The  
169 component groupings included the *in vitro* control, an early phase of infection (1.5 and 3  
170 hours post infection, HPI), a mid-phase of infection (6, 12, and 24 HPI), and a late phase of  
171 infection (48, 72, 96, and 120 HPI) (Figure 2B).

### 172 **Heat map analysis with k-means clustering**

173 Comparison of expression profiles is a powerful tool that can be used to identify and discover  
174 genes under the same regulatory regime. Furthermore, it was postulated that novel genes  
175 that showed similar expression profiles to known genes involved in pathogenicity might also  
176 have a role in causing disease. To identify such genes, similarities in the expression values  
177 for each gene were determined by first normalizing expression against its maximum value



178 and then clustering by k-means analysis [23]. This analysis was restricted to those genes  
179 displaying Reads Per Kilobase per Million (RPKM) values over 50 for at least one time-point,  
180 to eliminate lowly expressed genes from the analysis [24]. Of the 5985 predicted gene  
181 models in the core and accessory genomes of *Psa*, 269 genes did not display evidence of  
182 being expressed at any sample point, 1473 had no sample point with an RPKM above 50,  
183 and 4243 genes had at least one sample point with an RPKM value above 50 (Additional  
184 file 2). Hierarchical Clustering on Principal Components (HCPC) using the remaining 4243  
185 genes was used to partition a k-means analysis of genes into 13 clades (clusters) based on  
186 their expression profiles (Figure 3). These were further consolidated into six groups based  
187 on their broader expression patterns (Table 1). Of these 4243 genes, 1137 were  
188 constitutively expressed, 1323 genes were down-regulated *in planta*, and a further 815 did  
189 not show significant differential expression (Table 1). The remaining 968 genes were up-  
190 regulated *in planta* compared with *in vitro* and thus likely to have the most direct relevance  
191 to pathogenicity. Of the upregulated genes, there were three distinct groupings that  
192 differed in their temporal patterns and level of gene expression over the time course. These  
193 groups corresponded to 107 genes induced in the early (1.5 and 3 HPI) time points (early  
194 phase), followed by a group of 311 genes highly induced between 3 and 24 HPI (mid phase).  
195 The latter group included the majority of the T3SS and T3SE genes controlled by the HrpL  
196 regulon. Finally, 550 genes increased in their expression towards the late (48-120 HPI) time  
197 points (late phase). These three phases of gene expression were similar to the groupings  
198 identified by PCA analysis (Figure 2). Expression profiles were subsequently evaluated in  
199 more detail for genes with known or as yet undetermined roles in pathogenicity.

200

201 **Early phase of infection characterized by the induction of a type VI secretion system**  
202 **and nutrient adaptation**

203 Approximately 100 genes were up-regulated immediately upon contact with the host in the  
204 early phase of infection (1.5-3.0 HPI). These were found in clade 12 from the clustering  
205 analysis (Figure 3, Table 1). The majority of these genes were annotated as being involved  
206 in nutrient acquisition (Additional file 3). This probably reflects the adaptation to the surface  
207 of a leaf, where nutrients are scarce [25]. Genes that were particularly highly expressed  
208 included those predicted to be involved in phosphate and iron transport. In addition, some  
209 genes involved in the degradation of cell wall polymers, including a polygalacturonase  
210 (IYO\_008325), were in this group. However, few genes predicted to have a direct role in  
211 pathogenicity were found. Two of the 43 annotated chemotactic response genes  
212 (chemoreceptors) found in the *Psa* genome were highly expressed during the early phase  
213 (Additional file 3), but these two are not amongst those previously functionally characterized  
214 [26]. These chemoreceptors could have a role in locating stomata or other potential sites  
215 of entry into the plant. Another set of genes that was highly induced in this phase encodes  
216 a putative Type VI Secretion System (T6SS). Effectors secreted through the T6SS have a  
217 variety of roles usually associated with killing both prokaryotic and eukaryotic cells [27].  
218 Roles for T6SS effectors as virulence factors for animal pathogens have been well  
219 documented; however, there is as yet no evidence for an equivalent function in plant  
220 pathogens [28, 29]. Alternatively, the T6SS induced by *Psa* may have a role under field  
221 conditions in the antagonism of competing epiphytic microbes on the leaf surface.

222

### 223 **Mid-phase of infection characterized by expression of T3SS and T3SEs**

224 Genes from three clades (6, 10 and 11) from the clustering analysis show increased  
225 expression 3-24 HPI (Table 1). Of these the most striking is a large transcriptional  
226 commitment to the induction of the T3SS apparatus and the expression of T3SEs, which  
227 were among the most highly upregulated genes within these time points (Figure 3; Additional  
228 file 4). Transcripts encoding for T3SS and T3SEs rose from 1.5 HPI, peaking between 3  
229 and 12 HPI before falling to about half maximal levels for the remainder of the time course.  
230 Between 3 and 12 HPI these genes collectively accounted for 6.3% of the total reads  
231 (Additional file 4). Expression of *hrpA1* was by far the highest of all T3SS genes,  
232 accounting for over 50% of these reads. The HrpA protein comprises the needle of the T3SS  
233 apparatus. For plant pathogens the needle is much longer than that of animal pathogens  
234 because of the need to penetrate the host cell wall, thus presumably requiring higher  
235 expression of the corresponding gene [30].

236 The *Psa* biovar 3 genome has 40 genes encoding T3SEs, and 35 of these are predicted  
237 to encode full-length proteins [11], including one additional T3SE (*hopBN1*) recently  
238 identified (<http://pseudomonas-syringae.org/>). The expression profile of T3SEs during the  
239 mid-phase of infection followed that of the T3SS transcripts, rising rapidly after 1.5 HPI, with  
240 a maximum between 3 and 12 HPI, and then falling for the rest of the time course to around  
241 20-40% of the highest level. The expression levels of each effector varied considerably:  
242 most were relatively abundant, in particular *hopAU1*, *hopS2*, *hopAO2*, *hopAZ1*, *hopZ5* and  
243 *hopF2*, *avrRmp1*, *avrB4* and *avrPto5* peaked at over 1000 RPKM (Figure 4, Additional file

244 5). However, several other effectors were weakly expressed during all the early phases of  
245 infection < 150 RPKM, such as *hopAH1* and *hopBB1-2* (Figure 4, Additional file 5). This may  
246 be due to lack of a role for these particular genes in the infection of kiwifruit, expression at  
247 the later stages of disease development (after 120 HPI), or a role in the infection of tissues  
248 other than leaves.

249 The effector that displayed the most distinct temporal expression profile was *hopAS1*.  
250 This full-length (1361 residue) effector had low expression in the second phase of infection  
251 and peaked at 48 HPI. *Pto* strains that are pathogenic on *Arabidopsis thaliana* carry a C-  
252 terminal truncated version of this effector (e.g. DC3000 402 residues) and *hopAS1* is widely  
253 distributed in *P. syringae* [31]. Full-length versions caused effector-triggered immunity in  
254 almost all ecotypes of *Arabidopsis*, explaining why it effectively operates as a barrier to  
255 infection in this non-host. In contrast, deletion of the full-length version of *hopAS1* reduced  
256 virulence of *Pto* on tomato, suggesting it has a virulence function on this natural host. Both  
257 the *Pto* and *Psa* orthologs of this effector have a putative *hrp* box situated upstream of their  
258 putative start sites. In between lies a short uncharacterised potential open reading frame  
259 which could be an “unrecognised” effector chaperone. The *hopAS1* effector is also found in  
260 *P. syringae* pv. *phaseolicola*, where it was not found to be differentially expressed in  
261 response to induction of the HrpL TTSS regulatory system [32]. Unfortunately there are no  
262 strong clues about the possible biochemical function of *hopAS1*. It is one of the largest  
263 effectors (over 1300 residues, third largest *Psa* effector). Automated searching of the  
264 conserved domain database at NCBI identified just one tentative match (Bit score 51; E-  
265 value  $5.7e^{-6}$ ) to a 330 residue portion of a heterodimerization domain in the N-terminus of

266 the chromosome maintenance protein superfamily [33, 34]. Recently *hopAS1* was shown to  
267 be one of only six T3SEs from *Pto* able to bind to yeast plasma membrane, binding to several  
268 different phospho–inositol derivatives [35]. Unfortunately this research appears to have been  
269 performed with the truncated version of this gene from *Pto* DC3000. In contrast, the full-  
270 length *hopAS1* from *Psa* could not be localised when expressed in *Nicotiana benthamiana*,  
271 but this may be because it triggers cell death in that host [36].

272 T3SS and T3SEs are under the control of the HrpL regulon and hence their co-regulation  
273 would be expected. Several other genes that do not code for T3SEs also possess *hrp*  
274 boxes 5´ to their start site. These include genes that encode a putative lytic transglycosylase  
275 (IYO\_006775), M20 peptidase (IYO\_027210), *apbE* involved in thiamine biosynthesis  
276 (IYO\_010630), a phosphatidylserine decarboxylase (IYO\_025425), and an indole acetic  
277 acid-lysine ligase (*iaal*, IYO\_002060, Additional file 6). *iaal* is found adjacent to a gene  
278 encoding a multidrug and toxic compound extrusion protein (*mate*, IYO\_002055) on the  
279 chromosome of many *P. syringae* and *P. savastanoi* pathovars. Some *P. savastanoi*  
280 pathovars have an additional plasmid-associated *iaal* copy linked with indole acetic acid  
281 (IAA) production and gall formation. The proteins encoded by these genes are 92%  
282 identical, and the plasmid-located copy has been expressed heterologously and functionally  
283 characterized [37]. IAAL is postulated to convert free IAA into less active conjugate forms  
284 [38]. Heterologous expression of IAAL in tobacco and potato led to abnormal  
285 developmental changes [39]. Transcript levels of *Psa iaal* were induced early in infection  
286 and, in contrast to T3SS and T3SEs, remained high throughout the infection period; however,  
287 the adjacent *mate* gene did not appear to be highly expressed during this time period (Figure

288 5). In *Pto* DC3000 it has been shown that *iaaI* can be both transcribed independently and  
289 co-transcribed with *mate* as an operon [40].

290 Other sets of genes that were strongly expressed during the mid-phase of infection (3-  
291 12 HPI) included four co-located genes on two operons that code for a diguanylate cyclase  
292 and two transcription factors, and thus may have a regulatory role (IYO\_012110-25)  
293 (Additional file 7). Another set of four genes in two operons code for proteins involved in  
294 metal transport (IYO\_003310-25); included in these is the highly expressed copper  
295 resistance/binding protein *copZ* (IYO\_003325). Very high expression of the chemotaxis  
296 protein IYO\_006420 was also observed; while not a membrane-bound chemoreceptor, it is  
297 predicted to contain a 4-helix bundle, which is a common chemoreceptor sensor domain  
298 [26]. This protein is predicted to be structurally similar to di-iron binding proteins (Pfam  
299 09537), suggesting an alternate role in iron acquisition as opposed to chemoreception.

300

### 301 **Late phase of infection driven by nutrient acquisition and EPS production**

302 A total of 550 genes were upregulated in the later phase of infection (groups 7-9). Ninety  
303 genes increased over 5-fold in expression between 1.5 and 120 HPI (Additional file 8). Of  
304 these genes, 14 were annotated to be involved in alginate and colanic acid biosynthesis and  
305 polymer export. Alginate is a hygroscopic polymer composed of D-mannuronic acid  
306 residues interspersed with L-guluronic acid residues with various degrees of acetylation [41].  
307 This polymer has an important role in biofilm production and is well characterized in *P.*  
308 *aeruginosa* [42]. *P. syringae* is also known to produce alginate, but its role in pathogenicity  
309 is less well understood [43]. Recently it was shown that alginate accumulates in high

310 amounts in the sub-stomatal spaces in *Psa*-infected leaves of kiwifruit (Sutherland et al.,  
311 unpublished). A further 26 genes in this grouping were annotated as having a role in  
312 metabolite transport. This strongly suggests that as early-stage infection progresses there  
313 is a widespread induction of genes involved in metabolite transport and nutrient acquisition.  
314 These transporters are distinct from those observed in the early phase of leaf colonization.

315

### 316 **Expression of secondary metabolite pathways during infection**

317 Several predicted secondary metabolite biosynthesis pathways have been identified in *Psa*  
318 using either antiSMASH 4.0 [44, 45], or by similarity to known biosynthetic pathways  
319 (Additional file 9). Three of these pathways, for achromobactin, pyoverdine and  
320 yersiniabactin, are involved in iron accumulation. *Psa* biovar 3 produces fluorescent  
321 compounds, i.e. pyoverdine, when grown on King's B medium, but to a lesser extent than  
322 other *Psa* biovars [8]. The genes that code for this pathway appear to be poorly expressed  
323 *in planta* and on minimal media (Additional file 9). Genes coding for the alternative iron  
324 siderophores yersiniabactin and achromobactin are present in *Psa* but were also expressed  
325 at low levels *in planta* (Additional file 9). It has recently been postulated that plants are able  
326 to interfere with iron homeostasis in pathogenic bacteria, which may explain the apparent  
327 lack of expression of these pathways *in planta* [21]. Alternatively, *Psa* may be using a  
328 different mechanism for acquiring iron.

329 *Psa*-infected kiwifruit leaves show a distinct chlorotic halo which is presumably the result  
330 of the diffusion of a phytotoxin [8]. In addition to the three pathways with roles in iron  
331 absorption, there were four other secondary metabolite pathways identified in the *Psa* biovar

332 3 genome that have potential roles in pathogenicity and might account for leaf chlorosis.  
333 *Psa* biovar 3 possesses gene clusters involved in the biosynthesis of mangotoxin, a novel  
334 non-ribosomal peptide (NRP; IYO\_003775-003830), an unknown metabolite (IYO\_026725-  
335 026760), and an unknown compound synthesized from chorismate; the last-named pathway  
336 is plasmid-borne (Additional file 9). The genes involved in mangotoxin biosynthesis, NRP,  
337 and the unknown metabolite did not appear to be significantly induced during the early  
338 stages of infection, although genes in the NRP pathway were constitutively expressed  
339 between 50 and 100 RPKM throughout the infection time course (Additional file 9). While  
340 BLAST/antiSMASH searches did not identify likely products of either of the unknown  
341 biosynthetic pathways, many *Pseudomonas* spp. produce surfactive molecules to wet the  
342 leaf surface to aid motility [46]. In addition, the apoplast is a relatively dry environment that  
343 pathogens often modify to increase the relative humidity. For example, *syfA* - an NRP from  
344 *Pss* - produces an extremely hygroscopic molecule that facilitates wetting of surfaces  
345 including the leaf surface and apoplast [47-49].

346 The uncharacterized biosynthetic pathway on the plasmid of *Psa* biovar 3 has two  
347 operons, and is adjacent to a *luxR* receptor [50]. The first operon codes for a chorismate-  
348 utilizing enzyme and a glutamine amidotransferase (annotated as anthranilate synthase I  
349 and II) [11]. The second operon codes for the biosynthesis and secretion of a putative  
350 aromatic, but uncharacterized, compound that was strongly induced *in planta* after 12 HPI  
351 and remained steady for the remainder of the time course (Figure 6, Additional file 9). The  
352 plasmid-localized secondary metabolite pathway is not widespread in *P. syringae* but



353 interestingly is also present in the vascular pathogen *Xylella fastidiosa*, the causal agent of  
354 Pierce's disease, and some root-associated *Pseudomonas* species [11].

355

### 356 **Proteins secreted through the type II secretion system**

357 In addition to the translocation of proteins through specialized structures such as the T3SS  
358 and the T6SS, bacteria also use the Sec or Tat systems to secrete proteins into the  
359 periplasm for the Type II secretion system (T2SS) to export [51]. This system will target  
360 proteins *in planta* to the apoplast, as opposed to the cytoplasmic location of the T3SEs.  
361 This is an important function since the plant apoplast has a number of largely constitutive  
362 antimicrobial defenses such as phytoanticipins, hydrolytic enzymes and enzyme inhibitors  
363 that may need to be inactivated to facilitate colonization. Recently analysis of the *Pto*  
364 secretome identified a protease inhibitor Cip1 as playing a role in virulence of *Pto* on  
365 tomato [52]. We were therefore interested to see if there were T2SS proteins upregulated  
366 in the early and mid-phases of infection.

367 Type II secreted proteins (T2SP) can be identified by their canonical secretory leader  
368 sequence using SignalP [53]. Five hundred and thirty-nine proteins were predicted to be  
369 secreted. Of these proteins, 21 were induced in the early phase of infection (clade12).  
370 Of the significantly induced genes (ratio RPKM 3HPI/RPKM *in vitro* >5), the majority are  
371 predicted subunits of membrane-bound complexes with a role in nutrient transport  
372 (Additional file 10). All of these had annotations assigned.

373 Twenty-six proteins with predicted leader sequences were present in the mid phase of  
374 infection (Additional file 10). Of those strongly expressed compared to *in vitro* growth,

375 four were annotated as hypothetical proteins. However, two of these predicted gene  
376 products have similarity to enzyme inhibitors. IYO\_001870 has homology to a  
377 superfamily of vertebrate lysozyme inhibitors and IYO\_009660 contains a region with  
378 homology to Pfam domain 13670, present in some putative protease inhibitors. Both  
379 these proteins may have a role in neutralizing the apoplast and are candidates for further  
380 functional analysis. Forty-two non-annotated secreted proteins identified in the *Pto*  
381 genome were screened for the ability to inhibit the tomato C14 defense-related protease  
382 and one, Cip1, was shown to be an inhibitor [52]. Of these, 37 had orthologs (95%  
383 sequence identify) in *Psa* biovar 3 but only seven were clearly differentially expressed *in*  
384 *planta*. Interestingly, the *Psa* ortholog of Cip1 (IYO\_021465) was not differentially  
385 expressed during the time course in this study.

386

### 387 **Validation of expression profiles using reverse transcription quantitative PCR**

388 An independent infection time-course experiment was undertaken in order to validate the  
389 RNA-seq expression data. A total of 8 genes were selected for reverse transcription  
390 quantitative PCR (RT-qPCR) with their expression being assayed *in vitro* (IV) as well as at  
391 2, 24 and 72 HPI (Figure 7, Additional file 13). These time points represented the early, mid  
392 and late phases of infection previously described. When compared to the normalized  
393 expression ratio of the RNA-seq data, the normalized qPCR data from 6 of these genes  
394 displayed a regression value above 0.7 indicating a high level of consensus between the  
395 RNA-seq and qPCR datasets for these genes. Two of the selected genes (IYO 000005 and  
396 IYO 003790) displayed regression values below 0.5, however the regression of IYO 000005

397 increased to greater than 0.7 if the outlying IV time point was omitted. These results show  
398 that the expression profile of the bacteria at each infection phase is largely consistent with  
399 a different assay methodology and independent experimentation.

400

## 401 Discussion

402

403 RNA-seq was used to investigate the early stages of infection of kiwifruit plantlets by *Psa*  
404 biovar 3. This biovar is highly virulent on kiwifruit, with apoplastic CFU reaching a plateau  
405 from 6 days post inoculation in plantlet leaves. PCA and clustering analysis revealed  
406 three phases of gene expression *in planta* during early stages of colonization by *Psa*. The  
407 first was a rapid transient phase that occurred immediately upon contact with the plant.  
408 Included in these genes was a T6SS, which might have a role in pathogenesis, similarly to  
409 that in animal systems [27]. Alternatively, the T6SS may have a role in competition  
410 against epiphytic bacteria. Interestingly none of the other genes in this group had a  
411 predicted function that could have a direct role in pathogenicity. This suggests that these  
412 early expressed *Psa* genes play a role in rapid adaptation to the plant surface, since most  
413 of the bacterial counts were on the surface of the plant rather than the apoplast at this  
414 stage. Two chemotactic receptors were also highly expressed in this early phase. These  
415 are strong candidates for a role in sensing stomata, hydathodes and other points of entry  
416 for the pathogen.

417 In contrast, the mid phase of infection, which occurred between 3 and 12 HPI, included  
418 the T3SS and majority of the T3SEs. These genes were the most upregulated at these  
419 time points, accounting for over 6% of the transcripts detected. Similar results were  
420 observed for *Pto* colonization of Arabidopsis [21]. This is in contrast to the data observed  
421 for *Pss* during the early stages of infection of bean, where a large induction of either T3SS  
422 or T3SEs was not observed. This might be due to different infection strategies of the two

423 pathogens: *Pss* is regarded as a stronger epiphyte than other *P. syringae* pathovars,  
424 because the phylogroup it belongs to (II) has a greater focus on toxin production, and its  
425 members typically have fewer effectors than other *P. syringae* phylogroups [1]. The  
426 difference could alternatively be attributed to the different experimental approaches  
427 employed [19]. Levels of individual *Psa* T3SE gene expression varied considerably  
428 during the time course. However, the temporal expression pattern was largely consistent  
429 between effectors, with most (25/30) fitting into the mid-phase gene expression clusters 6,  
430 10 and 11. The most notable exception was *hopAS1*, which peaked later in expression  
431 around 48 HPI, as opposed to 3-12 HPI for most other effectors.

432 The roles of the T3SS and T3SE in repressing the induced host defense response are  
433 increasingly well understood. Less well understood is the repression of constitutive plant  
434 defenses in the apoplast, the inactivation of which is an essential prerequisite to the  
435 establishment of the T3SS. These defenses include phytoanticipins, cell wall degrading  
436 enzymes, proteases and enzyme inhibitors. Furthermore, the apoplast is a relatively dry  
437 space that needs to be humidified to optimize colonization [48, 49]. Two resident proteins  
438 in the conserved effector locus (CEL), *hopM* and *avrE*, appear to be important in  
439 establishing the right humidity conditions in other *P. syringae* hosts [54], and in *Psa* these  
440 effectors both follow the mid-peak expression profile but show only average expression  
441 levels. This study has also identified two predicted proteins that may have a role in  
442 neutralizing the apoplast. One was a predicted lysozyme inhibitor (IYO\_001870) and the  
443 other a predicted protease inhibitor (IYO\_009660). It is likely, however, that there are

444 further genes to be discovered that play a role in neutralizing the apoplast, including the  
445 production of potential surfactants.

446 The final phase comprised of genes whose expression progressively increased over  
447 the five-day (120 h) time course. Included were a raft of genes coding for proteins  
448 involved in nutrient acquisition such as transporters. Notably, these were different  
449 transporters from those induced at the very early phase of infection. There was also  
450 strong induction of genes involved in alginate and colanic acid production. These  
451 compounds are a large component of the extracellular polysaccharide substances (EPS)  
452 and known virulence factors of *Pseudomonas* [41, 43]. Their precise role in pathogenicity  
453 is not known, but they have been postulated to protect the bacteria from adversity, in this  
454 case plant defenses, and also to enhance adhesion to solid surfaces. Indeed alginate  
455 synthesis, along with ice nucleation, auxin synthesis and auxin inactivation by IAAL, is  
456 common among the canonical *P. syringae* lineages that have been traced back to a last  
457 common ancestor (LCA) 150-180 million years ago [55]. Another component predicted  
458 to be derived from the LCA is the tripartite pathogenicity island structure consisting of  
459 the *hrp/hrc* gene cluster flanked by both the CEL and an exchangeable effector locus  
460 (EEL). *Psa* shows this tripartite structure, albeit that the EEL is further away from the  
461 other two pathogenicity islands. The heat map analysis did not highlight any obvious  
462 differences in expression patterns between the effectors located on these three  
463 pathogenicity islands.

464 While effectors are well known to play a role in plant defense suppression, the role of  
465 many other genes expressed during infection is far less certain. This study has identified

466 a number of non-effector genes that were strongly induced *in planta* and are likely to be  
467 having a role in establishing infection. The relative importance of these will need to be  
468 ascertained using either gene knockouts or TraDIS (Transposon Directed Insertion-site  
469 Sequencing) [56, 57].

470

## 471 **Conclusions**

472

473 The results from this study indicate that there is a complex remodeling of the bacterial  
474 transcriptome during the early stages of infection, with at least three distinct phases of  
475 coordinated gene expression. The first describes genes induced during the immediate  
476 contact with the host. These include the expression of a T6SS and genes annotated as  
477 involved in nutrient transport. The second phase was dominated by genes predicted to  
478 have roles in initiating infection and includes the T3SS and T3SEs. Included in this group  
479 are novel proteins that may have roles in neutralizing constitutive defenses in the apoplast.  
480 The final phase includes genes involved in nutrient transport and biofilm formation.

481

## 482 **Experimental Procedures**

483

### 484 **Infection assays**

485 *Actinidia chinensis* Planch. var. *chinensis* 'Hort16A' plantlets, grown from axillary buds on  
486 Murashige and Skoog rooting medium without antibiotics in a 400-mL clear plastic tub with  
487 a sealed lid, were purchased from Multiflora (<http://www.multiflora.co.nz/home.htm>).  
488 Plantlets were grown at 20°C under fluorescent lights with a 16 h on/8 h off regime and used  
489 within a month of purchase. For inoculation an overnight shake culture of *Psa* ICMP 18884  
490 [11, 22] was grown in liquid Lysogeny Broth (LB) [58] at 20°C and 180 rpm shaking. The cell  
491 density was determined by measuring the absorbance at 600 nm. Cells were washed in 10  
492 mM MgSO<sub>4</sub> and resuspended at a cell density of 10<sup>7</sup> CFU/mL (*A*<sub>600</sub> 0.01). The surfactant  
493 Silwet L-77 (Cat VIS-30, Lehle Seeds, Round Rock, TX, USA) was added to the inoculum  
494 to a concentration of 0.0025% (v/v) to facilitate leaf wetting. The inoculation method was  
495 modified from that developed for *Arabidopsis* [59]. Containers with 'Hort16A' plantlets were  
496 filled with the inoculum fully submerging the plantlets and left for three minutes. Containers  
497 were drained, the lid replaced, then incubated in a controlled climate room at 20°C with a  
498 light/dark cycle of 16 h on/8 h off.

499

### 500 **Growth assay**

501 Leaf samples were taken at different times post inoculation as appropriate. Each sample  
502 consisted of four leaf discs, taken with a 1-cm diameter cork borer, from four different leaves.  
503 All four discs were taken from the same tub. To estimate CFU, the apoplast discs were



504 surface sterilized in 70% (v/v) ethanol for 30 s and subsequently washed in sterile Milli-Q  
505 water. Samples for estimation of total bacteria were not surface sterilized. Leaf discs  
506 were placed in Eppendorf tubes containing three stainless steel ball bearings and 300  $\mu$ L 10  
507 mM MgSO<sub>4</sub>, and macerated in a bead crusher for 2 min at maximum speed (Storm 24 Bullet  
508 Blender, Next Advance, Averill Park, NY, USA). A dilution series of the leaf homogenates  
509 was made in sterile 10 mM MgSO<sub>4</sub> until a dilution of 10<sup>-8</sup>. The dilution series was plated in  
510 5- $\mu$ L droplets on LB medium supplemented with both 12.5  $\mu$ g/mL nitrofurantoin and 40  
511  $\mu$ g/mL cephalixin. After 72 hours of incubation at 20°C CFU were counted for the lowest  
512 possible dilution(s), which was calculated back to the CFU per cm<sup>2</sup> of leaf area.

513

#### 514 **RNA extractions**

515 RNA was extracted from *Psa* ICMP 18884 grown to late log phase at 18°C on Hoitnik and  
516 Sinden minimal media [60]. Cells were harvested and total RNA extracted using an Ambion  
517 RNA extraction kit (Thermo Fisher, Waltham, MA, USA). RNA was extracted from 1-month-  
518 old *A. chinensis* var. *chinensis* 'Hort16A' plantlets propagated from tissue culture infected  
519 with *Psa* as described above after 1.5, 3, 6, 12, 24, 48, 72, 96 and 120 HPI. Each time point  
520 consisted of three biological replicates. Three pots were used for each time point and each  
521 biological replicate consisted of three combined plantlets sampled across each of the three  
522 pots (Additional file 11). Mock-inoculated plants (submerged in 10mM MgSO<sub>4</sub> only) were  
523 used as controls for each time point. RNA was extracted using the Spectrum™ Plant Total  
524 RNA Kit (Sigma-Aldrich, Milwaukee, WI, USA). Sequencing libraries were constructed from  
525 total RNA using the Ribo-Zero Plant procedure (Illumina, San Diego, CA, USA).

526

## 527 **Bioinformatics and differential expression analysis**

528 Sequencing was performed using HiSeq2000 (Illumina) by Macrogen ([www.macrogen.com](http://www.macrogen.com)).

529 Raw RNA reads (100 bp paired end reads) were independently trimmed, quality filtered  
530 and had their adaptors removed using Trimmomatic v0.36 [61]. The trimming process  
531 involved removing the Truseq adaptor sequences and the first 15 base pairs of each read  
532 sequence. Regions of low quality calling were also removed from each read using a sliding  
533 window of one nucleotide and a quality score above 20. Reads with a length greater than  
534 30 base pairs were selected for alignment following the trimming process.

535 Processed read sequences were aligned to the *Psa* ICMP 18884 genome sequence [22]  
536 using the Bowtie2 v2.25 aligner. HTSeq v0.9.1 was used in conjunction with the BAM  
537 outputs generated by Bowtie2 to count the number of alignments against the gene features  
538 defined in the corresponding *Psa* ICMP 18884 GFF3 file that had a mapping quality greater  
539 than 10 [62].

540 The count outputs for each gene feature acquired using HTSeq were used for differential  
541 expression analysis, principle component analysis, and for the calculation of Reads Per  
542 Kilobase per Million (RPKM) values. RPKM values were calculated by dividing the read  
543 alignment count for each gene feature in each library by the total number of reads in that  
544 library per million and then dividing this by the length of the gene in kilobases. Analysis of  
545 mapped read counts was done using the statistical software R (version 3.4.3). Principal  
546 component and differential expression analysis was done using the R package DESeq2  
547 (v1.18.1) [63].

548 K-means cluster analysis of expression data was done using the R packages ggplot2 (v2.2.1)  
549 [64], FactoMineR (v1.39) [65] and FactoExtra (v1.05) [66]. K-means analysis used the  
550 average expression of each gene across biological replicates that was normalized against  
551 the time point that displayed the highest level of expression for that gene. Hierarchical  
552 clustering on principal components was used to decide the 'optimum' minimum number of  
553 clusters (k) to partition the output of k-means analysis into. This was achieved by calculating  
554 the sum of the within-cluster variance with increasing numbers of clusters. These within  
555 cluster variances were plotted as a bar plot (Additional file 12) in order to determine the  
556 cluster number(s) that produced a notable loss of inertia (variance). A notable loss of inertia  
557 was observed at a cluster number of 2, 3, 6, 7, and 13. Partitioning of the data using a cluster  
558 number less than 13 did not adequately describe the patterns of expression in enough detail,  
559 while greater numbers generated unnecessary complexity. It was hence decided that a  
560 cluster number of 13 represented the optimal minimum number of clusters.

561

## 562 **RT-q-PCR validation of RNA-seq data**

563 To validate the RNA-seq dataset, total RNA was isolated from an independent infection  
564 experiment with three biological replicates using the Spectrum™ Plant Total RNA Kit  
565 (Sigma-Aldrich). RNA was DNaseI treated prior to cDNA synthesis to remove any  
566 potential genomic DNA contamination (Turbo DNA-free kit, Thermo Fisher Scientific).  
567 Relative quantification/Real-Time PCR (q-PCR) primers were designed for five reference  
568 genes and eight target genes using the Geneious software package (v10.0.3)  
569 (<https://www.geneious.com>) based on an annealing temperature of 60°C and short (< 120  
570 bp) amplicons (supplemental file 13). As the *Psa* transcript content is low in a  
571 background of a large amount of total plant RNA, gene-specific reverse transcription (RT)

572 primers were designed to prime the 1<sup>st</sup> strand cDNA of the *Psa* specific transcripts [67] .  
573 Each RT primer (including reference genes – see supplemental file 13) was mixed and  
574 used as a cocktail for 1<sup>st</sup> strand cDNA synthesis at a final concentration of 200 nM with 1  
575 µg of total RNA in a 20 µl reaction according to manufacturing instructions (Superscript IV  
576 reverse transcription kit, Invitrogen). After heat denaturing of the RNA at 65°C for 5 min,  
577 RT primers were annealed at 55°C for 2 minutes and 1<sup>st</sup> strand cDNA was synthesized at  
578 53°C for 20 minutes followed by 15x dilution prior to qPCR. No RNase H step was  
579 included.

580 RT-qPCR was performed (four technical replicates per sample) using a LightCycler®  
581 480 Real-Time PCR System (Roche Diagnostics, Indianapolis, USA) using the  
582 LightCycler® 480 SYBR Green I Master mix and amplified according to manufacturer's  
583 instructions (60°C annealing for 10 s followed by extension at 72 °C for 20 s for 40 cycles)  
584 [68]. None of the water (negative template) controls or plant derived samples without *Psa*  
585 infection showed any amplification with cross points (CP) <35. Any samples with CP >35  
586 were considered not expressed. Primer efficiencies were determined by serial template  
587 dilution. The best reference five genes were selected based on the RNA-seq experiment  
588 that showed low coefficient of variation (standard deviation divided by mean) and after RT-  
589 qPCR were validated using the Bestkeeper [69] and geNorm [70] tools. Based on this  
590 analysis, the geometric average CP of three genes was chosen (IYO\_010670,  
591 IYO\_009010 and IYO\_002170) to represent the reference. For visual comparison between  
592 RT-qPCR and RPKM data, values were normalized by representing maximum expression  
593 as 100. Pearson correlation coefficients (r) between RT-qPCR and RPKM data were  
594 calculated in Microsoft Excel (CORREL function).

595

596 **Abbreviations**

597 AAD: amino acid adenylation protein; CEL: Conserved effector locus; CFU: Colony-forming  
598 units; EEL: Exchangeable effector locus; GABA:  $\gamma$ -aminobutyric acid; GMD: GDP-mannose  
599 dehydrogenase; HPCP: Hierarchical clustering on principal components; HPI: Hours post  
600 inoculation; EPS: Extracellular polysaccharide substances; IV: *in vitro*; LB: Lysogeny broth;  
601 LCA: Last common ancestor; NRP: Non-ribosomal peptide; PCA: Principal component  
602 analysis; *Psa*: *Pseudomonas syringae* pv. *actinidiae*; *Pss*: *Pseudomonas syringae* pv.  
603 *syringae*; *Pto*: *Pseudomonas syringae* pv. *tomato*; RPKM: Reads per kilobase per million;  
604 RT: Reverse transcription; RT-qPCR: Reverse transcription quantitative PCR; SNP: Single  
605 nucleotide polymorphism; T2SS: Type II secretion system; T2SP: Type II secreted proteins;  
606 T3SS: Type III Secretion System; T3SE: Type III Secreted Effectors; T6SS: Type VI  
607 Secretion System; TraDIS: Transposon directed insertion-site sequencing; VST: variance  
608 stabilizing transformation.

609

610 **Ethics approval and consent to participate**

611 All experiments using *Psa* were carried out with the permission of the Ministry for Primary  
612 Industries, New Zealand (CTO approval 12-05-17) and The Environmental Protection  
613 Authority, New Zealand (APP202231).

614

615 **Consent to publish**

616 N/A

617

618 **Availability of data and materials**

619 The RNA-seq experiment is described in BioProject PRJNA472664 with separate  
620 BioSamples for each time-point (SAMN09240241-97), reads can be downloaded from the  
621 Sequence Read Archive SRP148711 [71].

622

623 **Competing interests**

624 The authors declare that they have no competing interests.

625

626 **Funding**

627 This work was funded by grants from the New Zealand Ministry for Business, Innovation and  
628 Employment (C11X1205) and the Bioprotection Centre for Research Excellence (NZ).

629

630 **Author contributions**

631 BC, ACA, NN and CGP conceived of and designed the experiments. BC, RH-K, OvdL, XC,  
632 NN, ES and JJ carried out the experiments and generated the data. PM, LB, NN, EHR and  
633 MDT analyzed the data. MDT, PM, NN, SN, EHR, and ACA wrote the paper.

634

635 **Acknowledgements**

636 We would like to thank Dr Joanna K. Bowen and Amali Thrimawithana (Plant and Food  
637 Research) for critically reviewing this manuscript.

638

639

640 **Author details**

641 <sup>1</sup>The New Zealand Institute for Plant and Food Research Limited, Auckland, New Zealand

642 <sup>2</sup>School of Biological Sciences, University of Auckland, Auckland, New Zealand

643 <sup>3</sup>Bio-Protection Research Centre, New Zealand

644 <sup>4</sup>Department of Molecular Medicine and Pathology, University of Auckland, New Zealand

645

## 646 References

647

- 648 1. Baltrus DA, Nishimura MT, Romanchuk A, Chang JH, Mukhtar MS, Cherkis K et al. Dynamic evolution of  
649 pathogenicity revealed by sequencing and comparative genomics of 19 *Pseudomonas syringae* isolates. PLoS  
650 Pathog. 2011; 7 (7):e1002132.
- 651 2. Monteil CL, Cai R, Liu H, Mechan L, Lontop ME, Leman S, Studholme DJ et al. Nonagricultural reservoirs  
652 contribute to emergence and evolution of *Pseudomonas syringae* crop pathogens. The New phytologist. 2013;  
653 199 (3):800-11.
- 654 3. Büttner D. Behind the lines—actions of bacterial type III effector proteins in plant cells. FEMS Microbiology  
655 Reviews. 2016; 40 (6):894-937.
- 656 4. Serizawa S, Ichikawa T, Takikawa Y, Tsuyumu S, Goto M. Occurrence of bacterial canker of kiwifruit in Japan  
657 description of symptoms, isolation of the pathogen and screening of bactericides. Japanese Journal of  
658 Phytopathology. 1989; 55 (4):427-36.
- 659 5. Takikawa Y, Serizawa S, Ichikawa T, Tsuyumu S, Goto M. *Pseudomonas syringae* pv. *actinidiae* pv. nov the  
660 causal bacterium of canker of Kiwifruit in Japan. Japanese Journal of Phytopathology. 1989; 55 (4):437-44.
- 661 6. Koh Y CB, Chung H, Lee D. Outbreak and spread of bacterial canker in kiwifruit. Korean Journal of Plant  
662 Pathology. 1994; 10:68-72.
- 663 7. Balestra GM, Mazzaglia A, Quattrucci A, Renzi M, Rossetti A. Current status of bacterial canker spread on  
664 kiwifruit in Italy. Australasian Plant Disease Notes. 2009; 4:34.
- 665 8. Everett KR, Taylor RK, Romberg MK, Rees-George J, Fullerton RA, Vanneste JL et al. First report of  
666 *Pseudomonas syringae* pv. *actinidiae* causing kiwifruit bacterial canker in New Zealand. Australasian Plant  
667 Disease Notes. 2011; 6:67-71.
- 668 9. Butler MI, Stockwell PA, Black MA, Day RC, Lamont IL, Poulter RTM. *Pseudomonas syringae* pv. *actinidiae* from  
669 recent outbreaks of kiwifruit bacterial canker belong to different clones that originated in China. PLoS One.  
670 2013; 8 (2):18.
- 671 10. Mazzaglia A, Studholme DJ, Taratufolo MC, Cai RM, Almeida NF, Goodman T et al. *Pseudomonas syringae* pv.  
672 *actinidiae* (Psa) Isolates from recent bacterial canker of Kiwifruit outbreaks belong to the same genetic  
673 lineage. PLoS One. 2012; 7 (5):11.
- 674 11. McCann HC, Rikkerink EHA, Bertels F, Fiers M, Lu A, Rees-George J et al. Genomic analysis of the Kiwifruit  
675 pathogen *Pseudomonas syringae* pv. *actinidiae* provides insight into the origins of an emergent plant disease.  
676 PLoS Pathog. 2013; 9 (7):e1003503.
- 677 12. Cuntly A, Poliakov F, Rivoal C, Cesbron S, Saux ML, Lemaire C et al. Characterization of *Pseudomonas syringae*  
678 pv. *actinidiae* (Psa) isolated from France and assignment of Psa biovar 4 to a *de novo* pathovar: *Pseudomonas*  
679 *syringae* pv. *actinidifoliorum* pv. nov. Plant Pathol. 2015; 64 (3):582-96.
- 680 13. McCann HC, Li L, Liu Y, Li D, Hui P, Zhong C et al. The origin and evolution of a pandemic lineage of the  
681 Kiwifruit pathogen *Pseudomonas syringae* pv. *actinidiae* Genome Biology and Evolution. 2017; 9 (4):932-44.
- 682 14. Fujikawa T, Sawada H. Genome analysis of the kiwifruit canker pathogen *Pseudomonas syringae* pv. *actinidiae*  
683 biovar 5. Scientific Reports. 2016; 6:21399.
- 684 15. Sawada H, Kondo K, Nakaune R. Novel biovar (biovar 6) of *Pseudomonas syringae* pv. *actinidiae* causing  
685 bacterial canker of kiwifruit (*Actinidia deliciosa*) in Japan. Jpn J Phytopathol. 2016; 82:101-15.
- 686 16. Marcelletti S, Ferrante P, Petriccione M, Firrao G, Scortichini M. *Pseudomonas syringae* pv. *actinidiae* draft  
687 genomes comparison reveal strain-specific features involved in adaptation and virulence to *Actinidia* species.  
688 PLoS One. 2011; 6 (11):17.



- 689 17. Filiatrault MJ, Stodghill PV, Bronstein PA, Moll S, Lindeberg M, Grills G et al. Transcriptome analysis of  
690 *Pseudomonas syringae* identifies new genes, noncoding RNAs, and antisense activity. *Journal of Bacteriology*.  
691 2010; 192 (9):2359-72.
- 692 18. Filiatrault MJ, Stodghill PV, Wilson J, Butcher BG, Chen H, Myers CR et al. *CrcZ* and *CrcX* regulate carbon source  
693 utilization in *Pseudomonas syringae* pathovar *tomato* strain DC3000. *RNA Biology*. 2013; 10 (2):245-55.
- 694 19. Yu X, Lund SP, Scott RA, Greenwald JW, Records AH, Nettleton D et al. Transcriptional responses of  
695 *Pseudomonas syringae* to growth in epiphytic versus apoplastic leaf sites. *Proc Natl Acad Sci U S A*. 2013; 110  
696 (5):E425-34.
- 697 20. Yu X, Lund SP, Greenwald JW, Records AH, Scott RA, Nettleton D et al. Transcriptional analysis of the global  
698 regulatory networks active in *Pseudomonas syringae* during leaf colonization. *mBio*. 2014; 5 (5):e01683-14.
- 699 21. Nobori T, Velásquez AC, Wu J, Kvitko BH, Kremer JM, Wang Y et al. Transcriptome landscape of a bacterial  
700 pathogen under plant immunity. *Proceedings of the National Academy of Sciences*. 2018; 115 (13):E3055-E64.
- 701 22. Templeton MD, Warren BA, Andersen MT, Rikkerink EHA, Fineran PC. Complete DNA sequence of  
702 *Pseudomonas syringae* pv. *actinidiae*, the causal agent of Kiwifruit canker disease. *Genome Announcements*.  
703 2015; 3 (5):e01054-15.
- 704 23. Liu P, Si Y: Cluster analysis of RNA-sequencing data. In: *Statistical Analysis of Next Generation Sequencing*  
705 *Data*. Edited by Datta S, Nettleton D. Cham: Springer International Publishing; 2014: 191-217.
- 706 24. Lee S, Seo CH, Lim B, Yang JO, Oh J, Lim M et al. Accurate quantification of transcriptome from RNA-Seq data  
707 by effective length normalization. *Nucleic Acids Research*. 2011; 39 (2):e9.
- 708 25. Mercier J, Lindow SE. Role of leaf surface sugars in colonization of plants by bacterial epiphytes. *Applied and*  
709 *Environmental Microbiology*. 2000; 66 (1):369-74.
- 710 26. McKellar JLO, Minnell JJ, Gerth ML. A high-throughput screen for ligand binding reveals the specificities of  
711 three amino acid chemoreceptors from *Pseudomonas syringae* pv. *actinidiae*. *Molecular Microbiology*. 2015;  
712 96 (4):694-707.
- 713 27. Kostiuk B, Unterweger D, Provenzano D, Pukatzki S. T6SS intraspecific competition orchestrates *Vibrio*  
714 *cholerae* genotypic diversity. *Int Microbiol*. 2017; 20 (3):130-7.
- 715 28. Ho BT, Dong TG, Mekalanos JJ. A view to a kill: The bacterial type VI secretion system. *Cell Host & Microbe*.  
716 2014; 15 (1):9-21.
- 717 29. Russell AB, Peterson SB, Mougous JD. Type VI secretion system effectors: poisons with a purpose. *Nat Rev*  
718 *Micro*. 2014; 12 (2):137-48.
- 719 30. Roine E, Wei W, Yuan J, Nurmiaho-Lassila EL, Kalkkinen N, M. R et al. Hrp pilus: an hrp-dependent bacterial  
720 surface appendage produced by *Pseudomonas syringae* pv. *tomato* DC3000. *Proc Natl Acad Sci USA*. 1997; 94  
721 (7):3459-64.
- 722 31. Sohn KH, Saucet SB, Clarke CR, Vinatzer BA, O'Brien HE, Guttman DS et al. HopAS1 recognition significantly  
723 contributes to Arabidopsis nonhost resistance to *Pseudomonas syringae* pathogens. *The New phytologist*.  
724 2012; 193 (1):58-66.
- 725 32. Mucyn TS, Yourstone S, Lind AL, Biswas S, Nishimura MT, Baltrus DA et al. Variable suites of non-effector  
726 genes are co-regulated in the type III secretion virulence regulon across the *Pseudomonas syringae* phylogeny.  
727 *PLoS pathogens*. 2014; 10 (1):e1003807.
- 728 33. Marchler-Bauer A, Bo Y, Han L, He J, Lanczycki CJ, Lu S et al. CDD/SPARCLE: functional classification of proteins  
729 via subfamily domain architectures. *Nucleic Acids Research*. 2017; 45 (Database issue):D200-D3.
- 730 34. Marchler-Bauer A, Derbyshire MK, Gonzales NR, Lu S, Chitsaz F, Geer LY et al. CDD: NCBI's conserved domain  
731 database. *Nucleic Acids Res*. 2015; 43 (Database issue):D222-6.
- 732 35. Weigele BA, Orchard RC, Jimenez A, Cox GW, Alto NM. A systematic exploration of the interactions between

- 733 bacterial effector proteins and host cell membranes. *Nature Communications*. 2017; 8:532.
- 734 36. Choi S, Jayaraman J, Segonzac C, Park H-J, Park H, Han S-W et al. *Pseudomonas syringae* pv. *actinidiae* type III  
735 effectors localized at multiple cellular compartments activate or suppress innate immune responses in  
736 *Nicotiana benthamiana*. *Frontiers in Plant Science*. 2017; 8 (2157)
- 737 37. Glass NL, Kosuge T. Cloning of the gene for indoleacetic acid-lysine synthetase from *Pseudomonas syringae*  
738 subsp. *savastanoi*. *Journal of Bacteriology*. 1986; 166 (2):598-603.
- 739 38. Ostrowski M, Mierek-Adamska A, Porowińska D, Goc A, Jakubowska A. Cloning and biochemical  
740 characterization of indole-3-acetic acid-amino acid synthetase PsGH3 from pea. *Plant Physiology and*  
741 *Biochemistry*. 2016; 107:9-20.
- 742 39. Spena A, Prinsen E, Fladung M, Schulze SC, Van Onckelen H. The indoleacetic acid-lysine synthetase gene of  
743 *Pseudomonas syringae* subsp. *savastanoi* induces developmental alterations in transgenic tobacco and potato  
744 plants. *Mol Gen Genet*. 1991; 227 (2):205-12.
- 745 40. Castillo-Lizardo MG, Aragón IM, Carvajal V, Matas IM, Pérez-Bueno ML, Gallegos M-T et al. Contribution of the  
746 non-effector members of the HrpL regulon, *iaaL* and *matE*, to the virulence of *Pseudomonas syringae* pv.  
747 *tomato* DC3000 in tomato plants. *BMC Microbiology*. 2015; 15:165.
- 748 41. Franklin MJ, Nivens DE, Weadge JT, Howell PL. Biosynthesis of the *Pseudomonas aeruginosa* extracellular  
749 polysaccharides, alginate, pel, and psl. *Frontiers in Microbiology*. 2011; 2:167.
- 750 42. Ghafoor A, Hay ID, Rehm BHA. Role of exopolysaccharides in *Pseudomonas aeruginosa* biofilm formation and  
751 architecture. *Applied and Environmental Microbiology*. 2011; 77 (15):5238-46.
- 752 43. Markel E, Stodghill P, Bao Z, Myers CR, Swingle B. AlgU controls expression of virulence genes in *Pseudomonas*  
753 *syringae* pv. *tomato* DC3000. *Journal of Bacteriology*. 2016; 198 (17):2330-44.
- 754 44. Weber T, Blin K, Duddela S, Krug D, Kim HU, Bruccoleri R et al. antiSMASH 3.0—a comprehensive resource for  
755 the genome mining of biosynthetic gene clusters. *Nucleic Acids Research*. 2015; 43 (W1):W237-W43.
- 756 45. Blin K, Wolf T, Chevrette MG, Lu X, Schwalen CJ, Kautsar SA et al. antiSMASH 4.0—improvements in chemistry  
757 prediction and gene cluster boundary identification. *Nucleic Acids Research*. 2017; 45 (W1):W36-W41.
- 758 46. Alshohim AS, Taylor TB, Barrett GA, Gallie J, Zhang X-X, Altamirano-Junqueira AE et al. The biosurfactant  
759 viscosin produced by *Pseudomonas fluorescens* SBW25 aids spreading motility and plant growth promotion.  
760 *Environmental Microbiology*. 2014; 16 (7):2267-81.
- 761 47. Hockett KL, Burch AY, Lindow SE. Thermo-regulation of genes mediating motility and plant interactions in  
762 *Pseudomonas syringae*. *PLoS ONE*. 2013; 8 (3):e59850.
- 763 48. Burch AY, Shimada BK, Browne PJ, Lindow SE. Novel high-throughput detection method to assess bacterial  
764 surfactant production. *Applied and Environmental Microbiology*. 2010; 76 (16):5363-72.
- 765 49. Burch AY, Shimada BK, Mullin SWA, Dunlap CA, Bowman MJ, Lindow SE. *Pseudomonas syringae* coordinates  
766 production of a motility-enabling surfactant with flagellar assembly. *Journal of Bacteriology*. 2012; 194  
767 (6):1287-98.
- 768 50. Patel HK, Ferrante P, Covaceuszach S, Lamba D, Scortichini M, Venturi V. The kiwifruit emerging pathogen  
769 *Pseudomonas syringae* pv. *actinidiae* does not produce AHLs but possesses three luxR solos. *PLoS One*. 2014;  
770 9 (1):e87862.
- 771 51. Green ER, Mecsas J. Bacterial secretion systems – an overview. *Microbiology spectrum*. 2016; 4  
772 (1):10.1128/microbiolspec.VMBF-0012-2015.
- 773 52. Shindo T, Kaschani F, Yang F, Kovács J, Tian F, Kourelis J et al. Screen of non-annotated small secreted proteins  
774 of *Pseudomonas syringae* reveals a virulence factor that inhibits Tomato immune proteases. *PLoS pathogens*.  
775 2016; 12 (9):e1005874.
- 776 53. Petersen TN, Brunak S, von Heijne G, Nielsen H. SignalP 4.0: discriminating signal peptides from

- 777 transmembrane regions. *Nature Methods*. 2011; 8:785.
- 778 54. Xin XF, Nomura K, Aung K, Velasquez AC, Yao J, Boutrot F et al. Bacteria establish an aqueous living space in  
779 plants crucial for virulence. *Nature*. 2016; 539 (7630):524-9.
- 780 55. Xin X-F, Kvitko B, He SY. *Pseudomonas syringae*: what it takes to be a pathogen. *Nature Reviews Microbiology*.  
781 2018; 16 (5):316-28.
- 782 56. Mesarich CH, Rees-George J, Gardner PP, Ghomi FA, Gerth ML, Andersen MT et al. Transposon insertion  
783 libraries for the characterization of mutants from the kiwifruit pathogen *Pseudomonas syringae* pv. *actinidiae*.  
784 *PLoS ONE*. 2017; 12 (3):e0172790.
- 785 57. Barquist L, Mayho M, C. C, Cain AK, Boinett CJ, Page AJ et al. The TraDIS toolkit: sequencing and analysis for  
786 dense transposon mutant libraries. *Bioinformatics*. 2016; 32 (7):1109-11.
- 787 58. Bertani G. Studies on lysogenesis. I. The mode of phage liberation by lysogenic *Escherichia coli*. *J Bacteriol*.  
788 1951; 62 (3):293-3000.
- 789 59. Ishiga Y, Ishiga T, Uppalapati SR, Mysore KS. Arabidopsis seedling flood-inoculation technique: a rapid and  
790 reliable assay for studying plant-bacterial interactions. *Plant Methods*. 2011; 7:32.
- 791 60. Hoitink HAJ, Sinden SL. Partial purification and properties of chlorosis inducing toxins of *Pseudomonas*  
792 *phaseolicola* and *Pseudomonas glycinea*. *Phytopathology*. 1970; 60:1236-7.
- 793 61. Bolger AM, Lohse M, Usadel B. Trimmomatic: A flexible trimmer for Illumina sequence data. *Bioinformatics*.  
794 2014; 30 (15):2114-20.
- 795 62. Langmead B, Trapnell C, Pop M, Salzberg SL. Ultrafast and memory-efficient alignment of short DNA  
796 sequences to the human genome. *Genome Biol* 2009; 10 (3):R25.
- 797 63. Love MI, Huber W, Anders S. Moderated estimation of fold change and dispersion for RNA-seq data with  
798 DESeq2. *Genome Biology*. 2014; 15 (12):550.
- 799 64. Warnes GR, Bolker B, Bonebakker L, Gentleman R, Wolfgang Huber W, Liaw A et al. gplots: various R  
800 programming tools for plotting data. R package version 301 2016;
- 801 65. Le S, Josse J, F. H. FactoMineR: An R package for multivariate analysis. *Journal of Statistical Software*. 2008; 25  
802 (1):1-18.
- 803 66. Kassambara A, Mundt F. factoextra: extract and visualize the results of multivariate data analyses. R package  
804 version 105. 2017;
- 805 67. Liles LC, Kumar MA, Weinschenker D. Use of Gene-Specific Primer Cocktails for First-Strand cDNA Synthesis  
806 With a Reverse Transcriptase Kit. *American Biotechnology Laboratory*. 2004; 22:20-1.
- 807 68. Chen X, Yauk YK, Nieuwenhuizen NJ, Matich AJ, Wang MY, Perez RL et al. Characterisation of an (s)-linalool  
808 synthase from kiwifruit (*Actinidia arguta*) that catalyses the first committed step in the production of floral  
809 lilac compounds. *Functional Plant Biology*. 2010; 37:232-43.
- 810 69. Pfaffl MW, Tichopád A, Prgomet C, Neuvians TP. Determination of stable housekeeping genes, differentially  
811 regulated target genes and sample integrity: BestKeeper – Excel-based tool using pair-wise correlations.  
812 *Biotechnology Letters* 2004; 26:509-15.
- 813 70. Vandesompele J, Preter KD, Pattyn F, Poppe B, Roy NV, Paepe AD et al. Accurate normalization of real-time  
814 quantitative RT-PCR data by geometric averaging of multiple internal control genes. *Genome Biology*. 2002;  
815 3:research0034.1.
- 816 71. Sayers EW, Barrett T, Benson DA, Bolton E, Bryant SH, Canese K et al. Database resources of the National  
817 Center for Biotechnology Information. *Nucleic Acids Res*. 2012; 40 (Database issue):D13-25.
- 818

820 Table 1. k-means clustering of 4243 genes Psa into 6 groups. HPI, hours post infection.

| Group | k-means clade | Number of genes | Description                                                | Expression Phase |
|-------|---------------|-----------------|------------------------------------------------------------|------------------|
| 1     | 1 & 13        | 1137            | Constitutively expressed genes                             | N/A              |
| 2     | 2,3, & 4      | 1323            | Genes down-regulated <i>in planta</i>                      | N/A              |
| 3     | 5             | 815             | Little differential expression compared to <i>in vitro</i> | N/A              |
| 4     | 6, 10 & 11    | 311             | Genes upregulated (3-24 HPI) <i>in planta</i>              | Mid              |
| 5     | 7,8, & 9      | 550             | Genes upregulated late (48-120 HPI) <i>in planta</i>       | Late             |
| 6     | 12            | 107             | Early upregulated (1.5-3 HPI) genes <i>in planta</i>       | Early            |

821

822

823 Figure 1. Time course of *Pseudomonas syringae* pv. *actinidiae* (*Psa*) infection of kiwifruit  
824 plantlets over 14 days. CFU, colony forming units; DPI, days post inoculation. (●)  
825 surface-sterilized; (■) non-surface sterilized. The experiment was duplicated and each  
826 had four technical replicates. Error bars represent SE, n=8. Zero-time controls had no  
827 *Psa* present.  
828

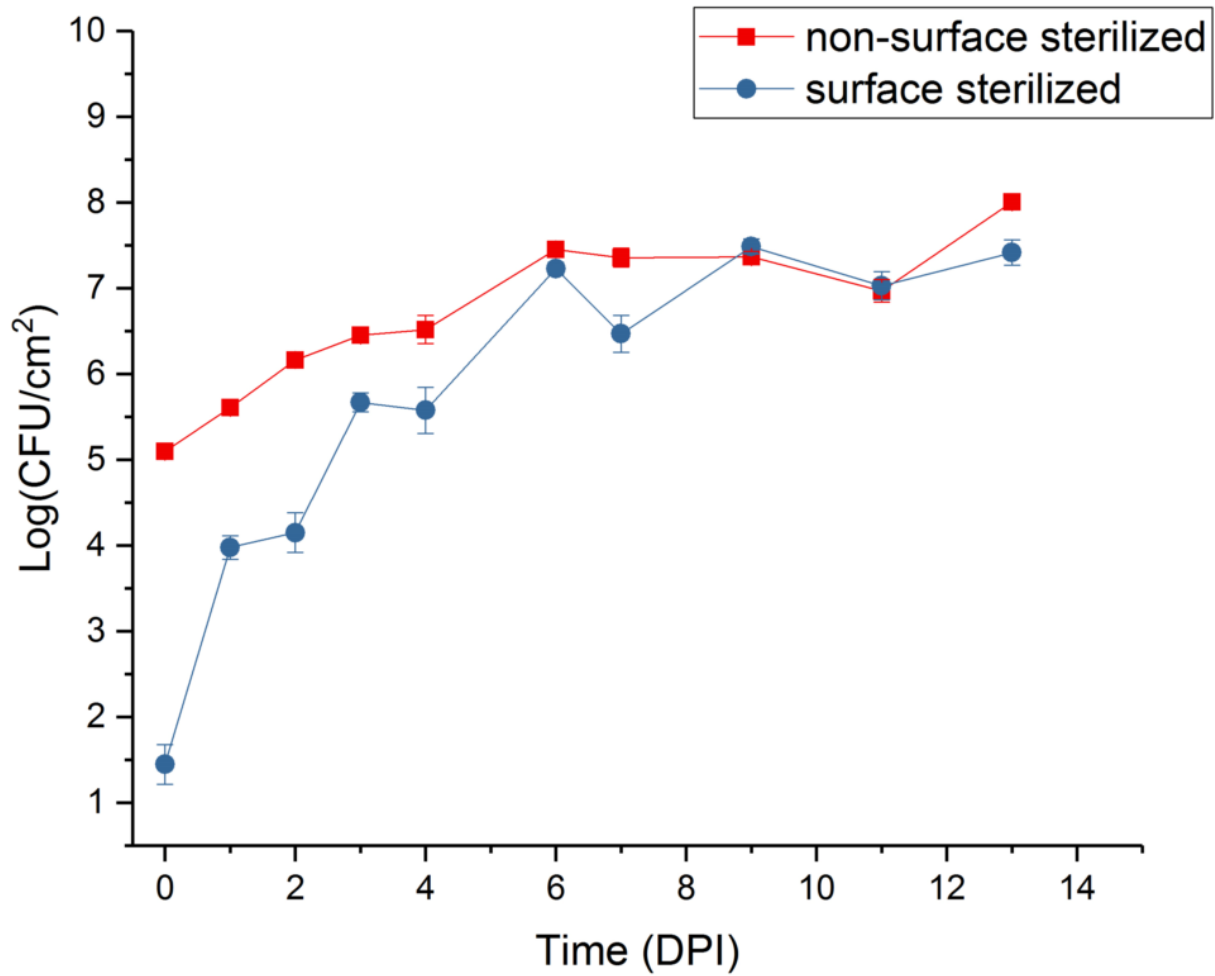

829  
830  
831

832 Figure 2. Principal component analysis plot (PCA) showing the clustering of VST (variance  
833 stabilizing transformation) transcriptomic data. (A) data points are colored by treatment  
834 time point (1.5 HPI, 3 HPI, 6 HPI, 12 HPI, 24 HPI, 48 HPI, 72 HPI, 96 HPI and 120 HPI).  
835 (B) data points are colored by infection phase (*in vitro*, Early (1.5-3 HPI), Mid (6-24 HPI),  
836 Late (48-120 HPI)). HPI, hours post infection.  
837

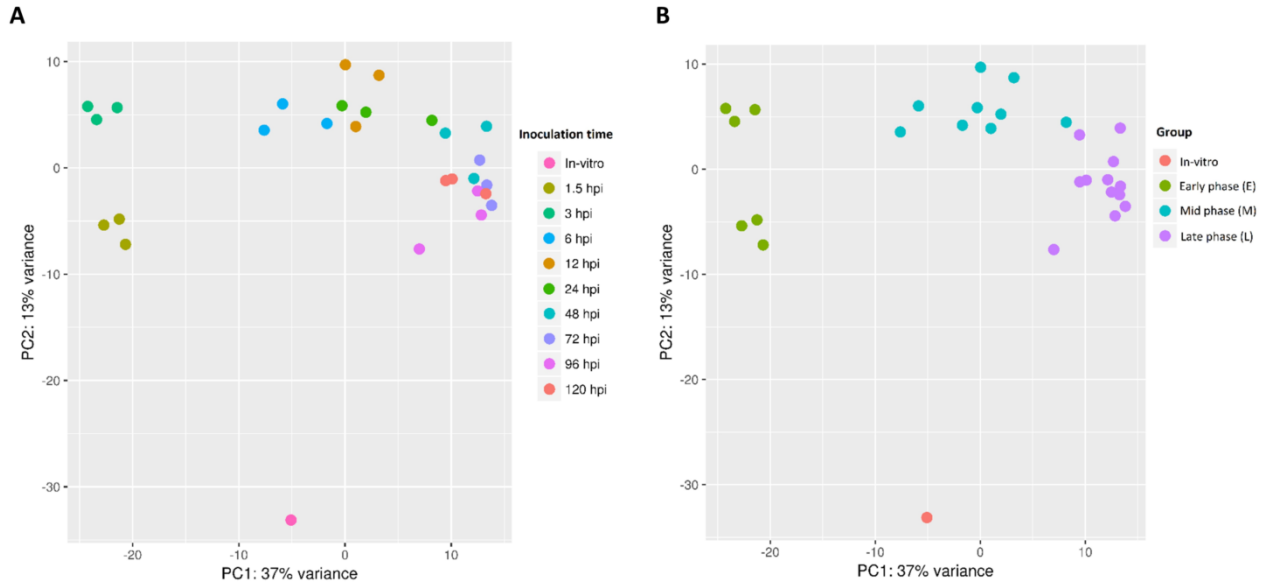

838

839

840

841 Figure 3. Heatmap and k-means clustering showing the expression of *Pseudomonas*  
842 *syringae* pv. *actinidiae* (*Psa*) genes in 'Hort16A' kiwifruit plantlets post infection. Similar  
843 expression profiles were clustered into 13 distinct groups by k-means. Line graphs  
844 displaying the prototype mean expression of each cluster (C) are included on the right.  
845 Error bars represent standard error.  
846

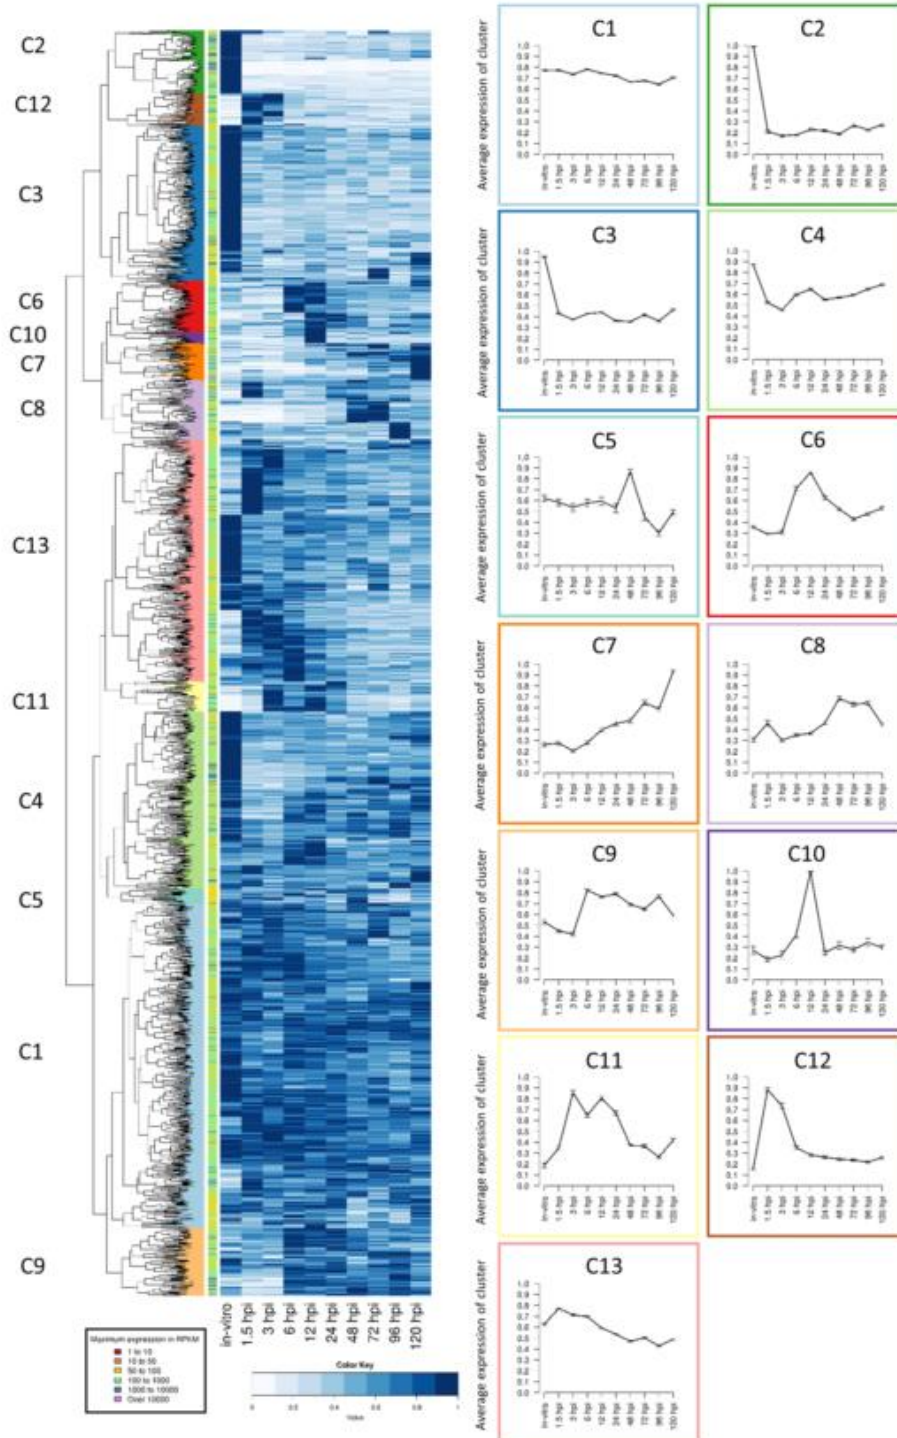

847  
848

849 Figure 4. A heatmap showing the expression profiles of predicted *Pseudomonas syringae*  
 850 pv. *actinidiae* (Psa) type III secretion system effectors at 10 time points during a infection  
 851 time course of a Hottr16a plantlets or in *in vitro* (IV) culture. This graph presents the log  
 852 base 2 of the RPKM values with stars (\*) indicating time points with significant ( $p < 0.01$ )  
 853 changes in expression compared to the IV time point.  
 854

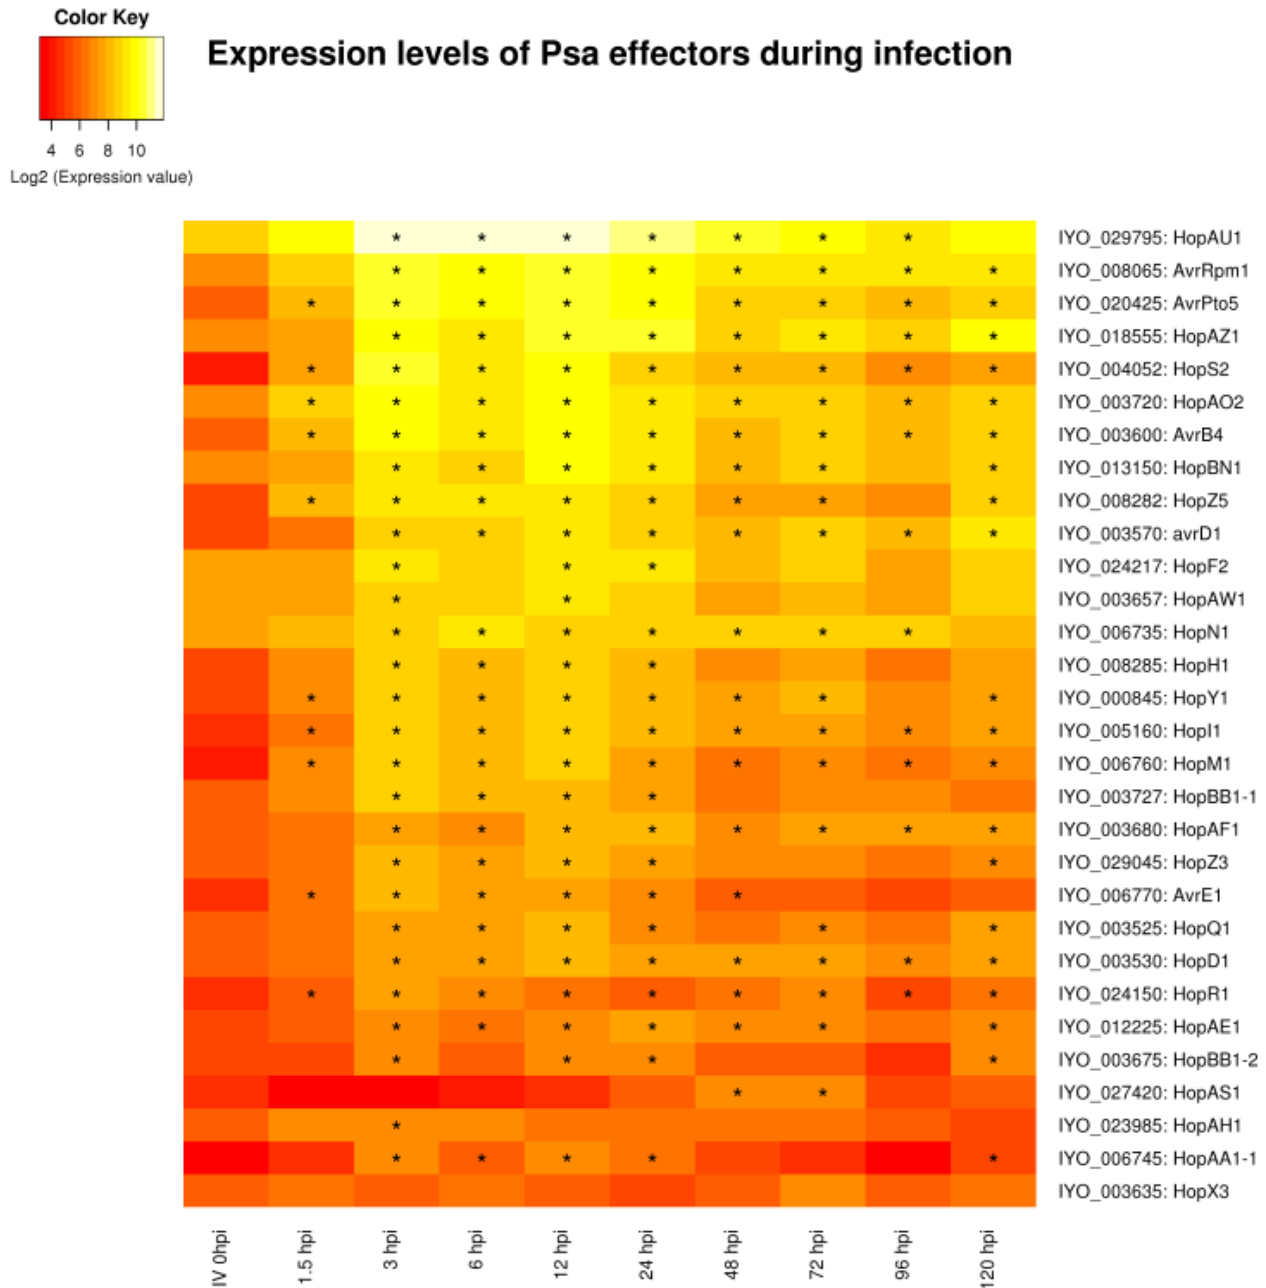

855

856



857 Figure 5. Expression of genes encoding *iaal* and *mate*. Reads per kb per million for *iaal*  
858 and *mate* were plotted over the infection time course. *dnaA* was included as a  
859 constitutively expressed control. Each point is the mean of three biological replicates with  
860 error bars representing standard error.  
861

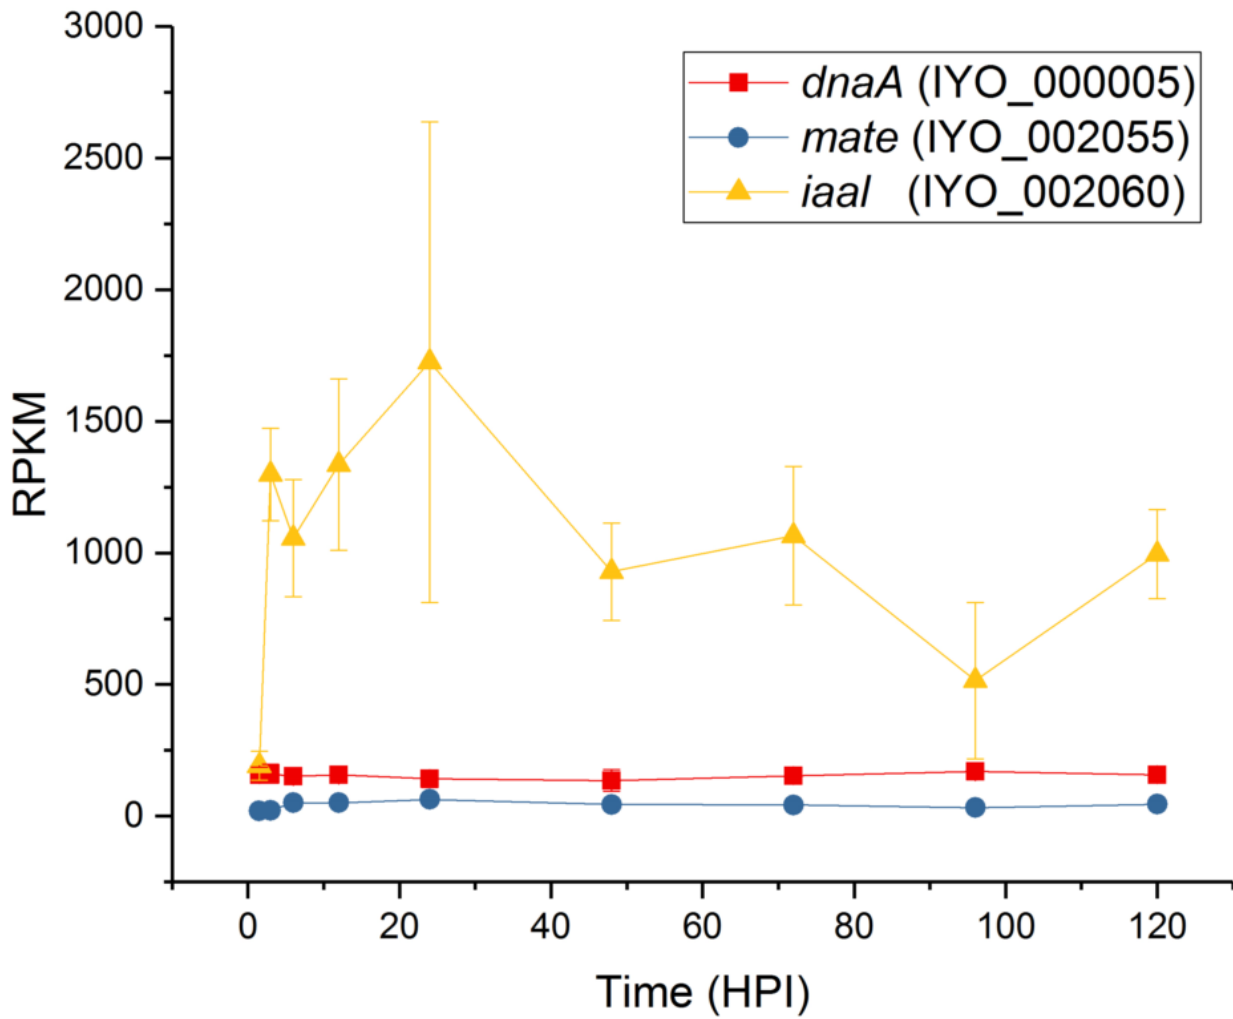

862  
863  
864

865 Figure 6. Expression of genes from the plasmid-borne putative aromatic biosynthetic  
866 pathway. Reads per kb per million values for the genes in the operon coding for the  
867 biosynthetic pathway of a putative aromatic compound plotted over the infection time  
868 course. Each point is the mean of three biological replicates with error bars representing  
869 standard error.  
870

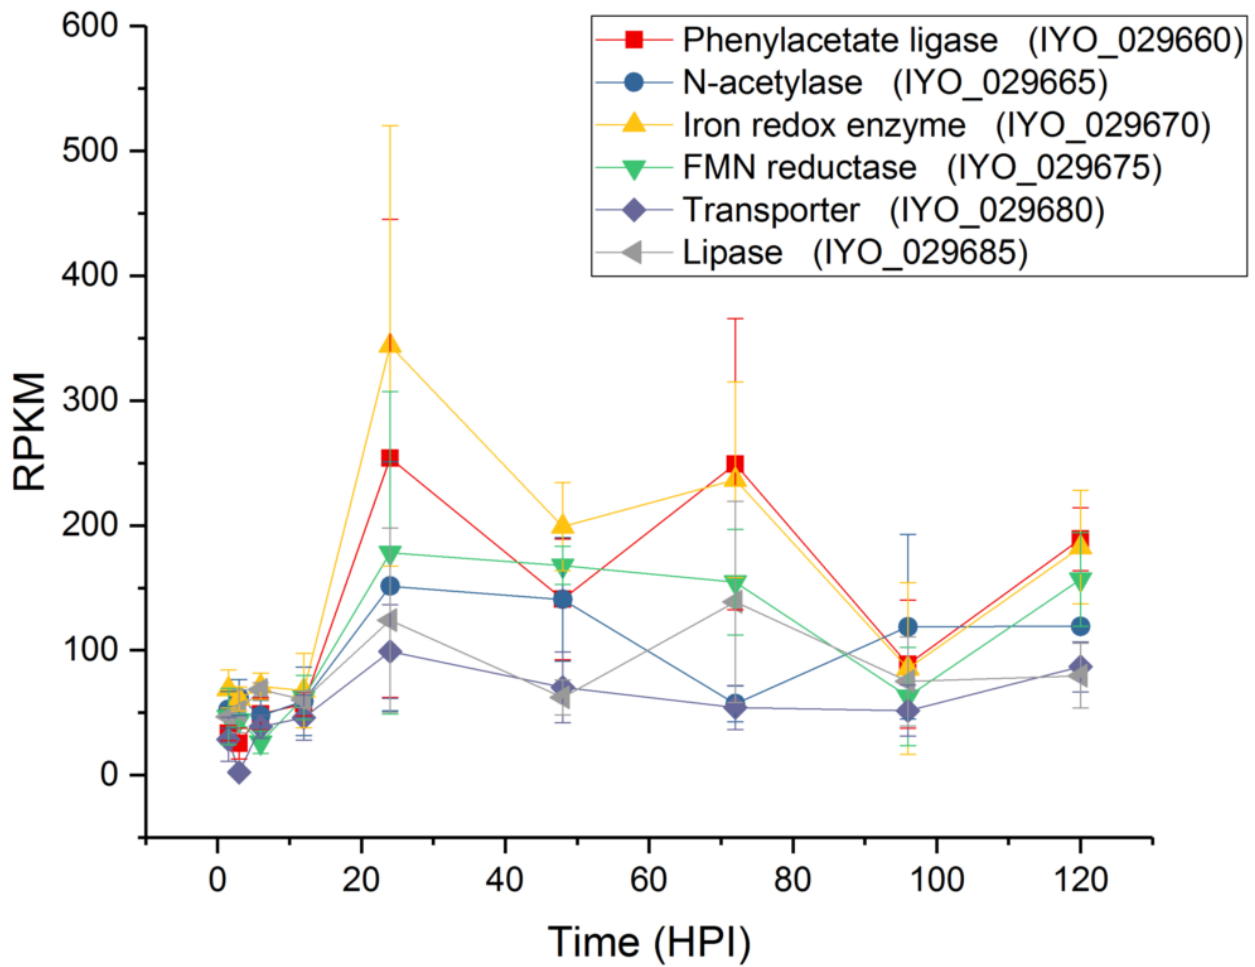

871

872

873

874 Figure 7. Reverse transcription quantitative PCR validation of RNA-seq data. Eight target  
 875 genes and five potential reference genes were selected for reverse transcription  
 876 quantitative PCR (RT-qPCR) (supplemental data set 13). RNA was extracted from *Psa*  
 877 grown *in vitro* (IV) infected ‘Hort16A’ plantlets at 2, 24 and 72 hours post infection (HPI).  
 878 RT-qPCR values (three biological replicates) were based on normalisation against the  
 879 geometric average/mean of three reference genes (IYO\_010670, IYO\_009010 and  
 880 IYO\_002170) selected using Bestkeeper and geNorm analysis [69, 70]. For comparison  
 881 with the RNA-seq data, values were displayed by representing maximum expression of  
 882 each gene as 100. Pearson correlation coefficients ( $r$ ) > 0.5 between the RT-qPCR and  
 883 RNA-seq data are displayed all primers are listed in supplemental data set 13. RT-qPCR  
 884 data is represented by black bars and RNA-seq (reads per kb per million) by grey bars. A:  
 885 HrpA1 (IYO\_006790); B: GDP-mannose dehydrogenase (GMD, IYO\_006070); C: Alginate  
 886 synthase (IYO\_006055); D: HopAU1 (IYO\_029795); E: IAL (IYO\_002060); F: AvrRpm1  
 887 (IYO\_008065); G: Amino acid adenylation protein (AAD, IYO\_003790); H: DNAA  
 888 (IYO\_000005).  
 889  
 890

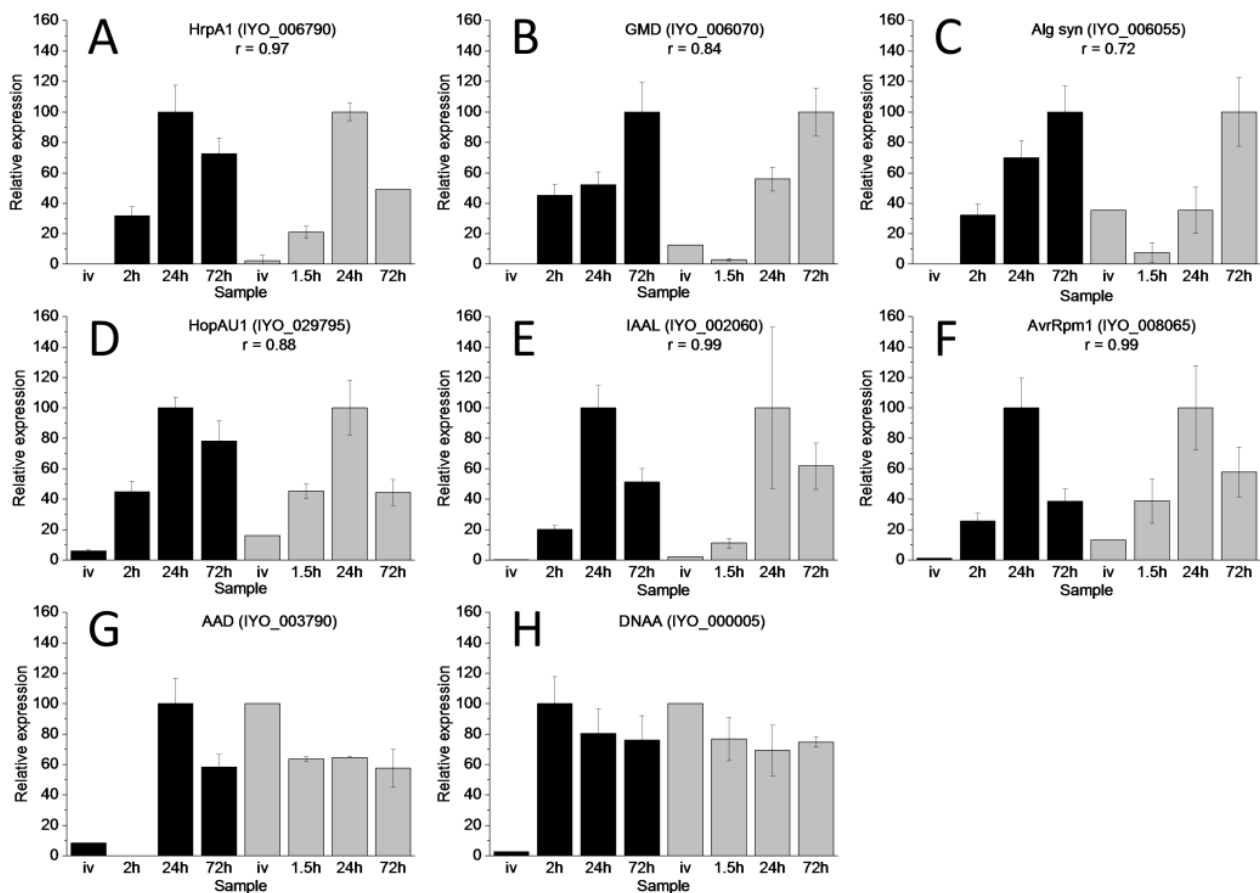

891

892 **Additional file 1:**

893 Images illustrating the time course of symptom development of kiwifruit plantlets infected  
894 with *Psa*. (A) Abaxial side of leaf at day 0; (B) Adaxial side of leaf at day (0); (C) Pottle  
895 containing plantlets at day 0; (D) Abaxial side of leaf five days post inoculation (DPI) with  
896 water soaked lesions appearing; (E) Adaxial side of leaf 14 DPI with necrotic lesions  
897 present; (F) Plantlets 50 DPI (pptx).

898

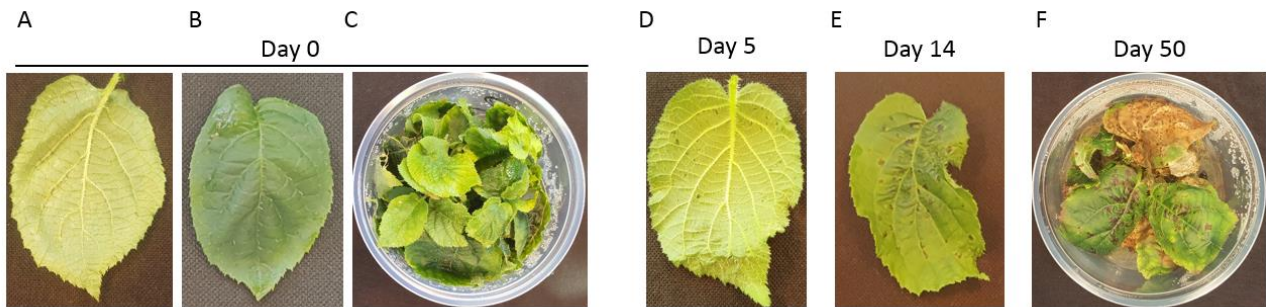

899

900

901

902

903 **Additional file 2:**

904 Reads per Kilobase per Million (RPKM) for all *Psa* genes (sheet 1) and k-means analysis  
905 for those genes with >50 RPKM for at least one time point (sheet 2) (xlsx).

906

907 **Additional file 3:**

908 Early induced genes ranked by the ratio of expression at three hours post infection (HPI)  
 909 compared with *in vitro* (cutoff 5-fold) (docx).

910

| Gene ID    | Gene Annotation                                      | 3 HPI/ <i>in vitro</i> | P value  |
|------------|------------------------------------------------------|------------------------|----------|
| IYO_011995 | phosphate ABC transporter substrate-binding protein  | 148.8                  | 4.60E-41 |
| IYO_012000 | phosphate ABC transporter permease                   | 43.7                   | 3.31E-29 |
| IYO_019585 | thioredoxin                                          | 31.4                   | 6.68E-31 |
| IYO_012010 | phosphate ABC transporter ATP-binding protein        | 30.8                   | 1.50E-33 |
| IYO_018790 | magnesium transporter CorA                           | 30.8                   | 8.40E-24 |
| IYO_027385 | ABC transporter substrate-binding protein            | 29.5                   | 1.15E-19 |
| IYO_027390 | GntR family transcriptional regulator                | 25.0                   | 2.15E-13 |
| IYO_015395 | hypothetical protein                                 | 23.9                   | 1.38E-10 |
| IYO_006115 | amino acid ABC transporter substrate-binding protein | 23.3                   | 8.31E-37 |
| IYO_027380 | ABC transporter permease                             | 21.5                   | 1.65E-13 |
| IYO_028665 | phosphate-binding protein                            | 20.4                   | 5.18E-52 |
| IYO_018545 | acid phosphatase                                     | 19.5                   | 5.16E-26 |
| IYO_000970 | ammonia channel protein                              | 18.7                   | 1.03E-26 |
| IYO_006555 | chemotaxis protein                                   | 17.4                   | 3.36E-61 |
| IYO_021410 | short-chain dehydrogenase                            | 17.2                   | 4.98E-09 |
| IYO_013555 | type VI secretion effector protein (Hcp)             | 16.3                   | 1.59E-20 |
| IYO_013560 | EvpB family type VI secretion protein                | 15.9                   | 9.21E-28 |
| IYO_028645 | transcriptional regulator PhoU                       | 14.3                   | 7.85E-27 |
| IYO_002185 | peptidase M19                                        | 13.6                   | 7.60E-17 |
| IYO_010675 | phosphatase                                          | 12.6                   | 7.44E-13 |
| IYO_021050 | ABC transporter substrate-binding protein            | 12.5                   | 4.36E-34 |
| IYO_013550 | Type VI secretion protein                            | 12.2                   | 2.07E-16 |
| IYO_013565 | type VI secretion protein                            | 11.7                   | 2.77E-16 |

|            |                                                 |      |          |
|------------|-------------------------------------------------|------|----------|
| IYO_001685 | MFS transporter                                 | 11.6 | 1.44E-39 |
| IYO_021420 | polysaccharide deacetylase                      | 10.9 | 4.26E-14 |
| IYO_020035 | ABC transporter substrate-binding protein       | 10.8 | 5.31E-20 |
| IYO_027365 | metallophosphatase                              | 10.4 | 2.18E-08 |
| IYO_014740 | sugar ABC transporter substrate-binding protein | 10.2 | 3.60E-29 |
| IYO_002190 | hydrocarbon binding protein                     | 9.8  | 3.80E-06 |
| IYO_020310 | hypothetical protein                            | 9.7  | 4.61E-06 |
| IYO_013545 | type VI secretion system protein ImpG           | 9.5  | 1.15E-16 |
| IYO_006130 | glutamine ABC transporter ATP-binding protein   | 9.4  | 4.49E-20 |
| IYO_028615 | transcriptional regulator PhoB                  | 9.2  | 5.26E-17 |
| IYO_004270 | chemotaxis protein                              | 9.1  | 5.83E-19 |
| IYO_001975 | nitrogen regulation protein NR(I)               | 9.1  | 2.23E-18 |
| IYO_002205 | electron transfer flavoprotein subunit alpha    | 8.8  | 4.35E-05 |
| IYO_025185 | urease accessory protein UreG                   | 8.7  | 2.64E-07 |
| IYO_021405 | 3-oxoacyl-ACP reductase                         | 8.5  | 3.81E-04 |
| IYO_026920 | ABC transporter permease                        | 8.5  | 1.68E-06 |
| IYO_006120 | amino acid ABC transporter permease             | 7.5  | 4.63E-25 |
| IYO_002210 | electron transfer flavoprotein subunit beta     | 7.4  | 1.27E-02 |
| IYO_027370 | iron ABC transporter substrate-binding protein  | 7.3  | 7.54E-10 |
| IYO_027375 | ABC transporter permease                        | 6.8  | 1.39E-03 |
| IYO_018365 | MFS transporter                                 | 6.6  | 7.33E-05 |
| IYO_014745 | xylose isomerase                                | 6.3  | 3.08E-11 |
| IYO_018070 | ATPase                                          | 6.2  | 9.96E-03 |
| IYO_006260 | acetyltransferase                               | 6.0  | 7.07E-06 |
| IYO_027495 | sarcosine oxidase subunit alpha                 | 5.9  | 5.62E-14 |
| IYO_001120 | hypothetical protein                            | 5.8  | 1.04E-04 |
| IYO_026150 | acyl carrier protein                            | 5.6  | 1.92E-01 |
| IYO_004585 | branched-chain amino acid ABC transporter       | 5.6  | 4.05E-16 |

|                   |                               |     |          |
|-------------------|-------------------------------|-----|----------|
|                   | substrate-binding protein     |     |          |
| <b>IYO_009210</b> | quercetin 2,3-dioxygenase     | 5.5 | 4.42E-03 |
| <b>IYO_014735</b> | xylose transporter            | 5.5 | 9.61E-09 |
| <b>IYO_025180</b> | urease accessory protein UreF | 5.5 | 7.13E-04 |
| <b>IYO_021415</b> | MFS transporter               | 5.2 | 7.97E-05 |

911

912

913

914



915 **Additional file 4:**

916 Genes most highly upregulated in the mid phase of the infection time course (3-24 hours  
 917 post infection, (HPI)). Genes are ranked on the ratio of maximum Reads Per Kilobase  
 918 per Million over that time period compared with *in vitro* expression (cutoff 5-fold) (docx).  
 919

| Gene ID    | Gene Annotation                          | Ratio | P-value |
|------------|------------------------------------------|-------|---------|
| IYO_006750 | type III secretion protein HrpW          | 257.7 | 4.4E-64 |
| IYO_022020 | hemolysin                                | 176.9 | 9.7E-44 |
| IYO_006820 | type III secretion protein               | 118.8 | 2E-88   |
| IYO_006755 | Shc Hop M1 (disrupted)                   | 104.0 | 1.2E-48 |
| IYO_006865 | type III secretion system protein        | 77.2  | 2.7E-35 |
| IYO_006790 | HrpA1                                    | 77.0  | 1.7E-72 |
| IYO_004052 | HopS2                                    | 76.4  | 1E-37   |
| IYO_006825 | type III secretion protein               | 67.5  | 7.8E-44 |
| IYO_006875 | type III secretion protein               | 62.6  | 2.8E-28 |
| IYO_006880 | type III secretion protein               | 54.0  | 1.8E-49 |
| IYO_006795 | type III secretion protein HrpZ          | 52.4  | 3.5E-38 |
| IYO_012110 | Ais protein                              | 52.2  | 6.6E-21 |
| IYO_006905 | RNA polymerase sigma factor<br>HrpL      | 50.3  | 6E-38   |
| IYO_022025 | glycerol acyltransferase                 | 47.4  | 4E-16   |
| IYO_002060 | IAA lysine ligase                        | 46.4  | 6.2E-20 |
| IYO_004050 | type III chaperone ShcO1                 | 44.3  | 8.2E-37 |
| IYO_006830 | secretin                                 | 44.1  | 1E-37   |
| IYO_028770 | LysR family transcriptional<br>regulator | 44.1  | 4.7E-25 |
| IYO_003325 | copper resistance protein CopZ           | 41.4  | 8.7E-27 |
| IYO_006910 | type III effector HrpK                   | 39.6  | 3.5E-34 |
| IYO_012005 | phosphate ABC transporter                | 37.7  | 3.1E-32 |

|                   |                                                 |      |         |
|-------------------|-------------------------------------------------|------|---------|
|                   | permease                                        |      |         |
| <b>IYO_028960</b> | sulfonate ABC transporter<br>permease           | 35.7 | 1.4E-12 |
| <b>IYO_006420</b> | chemotaxis protein                              | 35.7 | 4.3E-25 |
| <b>IYO_014395</b> | lytic transglycosylase                          | 31.2 | 4.2E-24 |
| <b>IYO_014235</b> | hypothetical protein                            | 30.4 | 4.3E-21 |
| <b>IYO_006890</b> | type III secretion protein                      | 30.4 | 9.3E-29 |
| <b>IYO_006860</b> | type III secretion system protein<br>SsaR       | 30.2 | 5E-28   |
| <b>IYO_006870</b> | type III secretion system protein               | 29.3 | 1.4E-18 |
| <b>IYO_006815</b> | type III secretion protein                      | 29.0 | 8.1E-30 |
| <b>IYO_028955</b> | nitrate ABC transporter ATP-<br>binding protein | 28.3 | 4.5E-08 |
| <b>IYO_005735</b> | glycoside hydrolase                             | 25.8 | 1.2E-24 |
| <b>IYO_006900</b> | type III secretion protein HrpJ                 | 25.2 | 3.3E-29 |
| <b>IYO_003725</b> | type III chaperone protein ShcF                 | 23.8 | 1.1E-10 |
| <b>IYO_006800</b> | type III secretion protein                      | 23.3 | 9.7E-29 |
| <b>IYO_020425</b> | AvrPto5                                         | 23.3 | 3.3E-32 |
| <b>IYO_006810</b> | type III secretion protein                      | 22.4 | 1.4E-30 |
| <b>IYO_006805</b> | type III secretion protein                      | 22.1 | 1.6E-51 |
| <b>IYO_006885</b> | ATP synthase                                    | 21.3 | 1.6E-21 |
| <b>IYO_006855</b> | type III secretory protein EscS                 | 20.8 | 1.3E-06 |
| <b>IYO_006765</b> | type III chaperone ShcE                         | 18.8 | 5.1E-18 |
| <b>IYO_006760</b> | HopM1                                           | 18.2 | 8.6E-32 |
| <b>IYO_003570</b> | avrD1                                           | 18.0 | 4.8E-11 |
| <b>IYO_014245</b> | membrane protein                                | 17.9 | 0.01651 |
| <b>IYO_029290</b> | type III chaperone protein ShcF                 | 17.8 | 1.1E-11 |
| <b>IYO_006850</b> | type III secretion system protein               | 17.5 | 1.3E-13 |

|                   |                                                          |      |         |
|-------------------|----------------------------------------------------------|------|---------|
| <b>IYO_029040</b> | type III secretion chaperone<br>CesT                     | 16.9 | 1.2E-12 |
| <b>IYO_008282</b> | HopZ5                                                    | 16.8 | 1.4E-10 |
| <b>IYO_009200</b> | hypothetical protein                                     | 16.8 | 4.7E-16 |
| <b>IYO_005160</b> | HopI1                                                    | 16.6 | 3.7E-21 |
| <b>IYO_012125</b> | diguanylate cyclase                                      | 16.1 | 2.4E-19 |
| <b>IYO_006895</b> | type III secretion protein Hrpl                          | 15.6 | 2.8E-30 |
| <b>IYO_003600</b> | AvrB4                                                    | 15.5 | 4.7E-22 |
| <b>IYO_022140</b> | SAM-dependent<br>methyltransferase                       | 14.6 | 3E-23   |
| <b>IYO_012120</b> | AraC family transcriptional<br>regulator                 | 13.9 | 9.3E-12 |
| <b>IYO_002045</b> | hypothetical protein                                     | 13.8 | 5.1E-05 |
| <b>IYO_017375</b> | phosphonate/organophosphate<br>ester transporter subunit | 13.2 | 9.7E-09 |
| <b>IYO_018555</b> | HopAZ1                                                   | 12.9 | 1.3E-16 |
| <b>IYO_012115</b> | XRE family transcriptional<br>regulator                  | 12.2 | 7.3E-21 |
| <b>IYO_006745</b> | HopAA1-1                                                 | 11.8 | 9.8E-12 |
| <b>IYO_028535</b> | NADP transhydrogenase<br>subunit alpha                   | 11.6 | 6.2E-09 |
| <b>IYO_008285</b> | HopH1                                                    | 11.4 | 1.3E-06 |
| <b>IYO_008065</b> | AvrRpm1                                                  | 11.4 | 5E-10   |
| <b>IYO_010805</b> | LuxR family transcriptional<br>regulator                 | 11.4 | 2.7E-09 |
| <b>IYO_029795</b> | HopAU1                                                   | 10.9 | 1.2E-05 |
| <b>IYO_006770</b> | AvrE1                                                    | 10.8 | 1.2E-21 |
| <b>IYO_000845</b> | HopY1                                                    | 10.7 | 1.2E-10 |

|                   |                                           |      |         |
|-------------------|-------------------------------------------|------|---------|
| <b>IYO_003720</b> | HopAO2                                    | 10.7 | 7.7E-21 |
| <b>IYO_012140</b> | protein tolQ                              | 10.2 | 4.9E-06 |
| <b>IYO_022695</b> | alkaline phosphatase                      | 10.2 | 3.4E-13 |
| <b>IYO_006250</b> | tail protein                              | 10.1 | 2.1E-20 |
| <b>IYO_027360</b> | transcriptional initiation protein<br>Tat | 9.7  | 1.7E-11 |
| <b>IYO_009265</b> | serine/threonine protein<br>phosphatase   | 9.4  | 4.2E-08 |
| <b>IYO_016255</b> | Ais protein                               | 9.2  | 3.8E-09 |
| <b>IYO_024150</b> | HopR1                                     | 9.0  | 4.3E-25 |
| <b>IYO_023400</b> | energy transducer TonB                    | 8.9  | 0.00019 |
| <b>IYO_009660</b> | hypothetical protein                      | 8.9  | 0.00138 |
| <b>IYO_027435</b> | DNA polymerase III subunit<br>epsilon     | 8.4  | 4E-08   |
| <b>IYO_012610</b> | MarR family transcriptional<br>regulator  | 8.4  | 6.1E-05 |
| <b>IYO_013150</b> | HopBN1                                    | 8.0  | 7.4E-12 |
| <b>IYO_002040</b> | hypothetical protein                      | 8.0  | 0.00434 |
| <b>IYO_012030</b> | nitrite reductase                         | 7.7  | 0.00011 |
| <b>IYO_013145</b> | type III chaperone protein ShcF           | 7.7  | 3.8E-07 |
| <b>IYO_003727</b> | HopBB1-1                                  | 7.7  | 1.6E-08 |
| <b>IYO_029288</b> | AvrRpm2 (frameshifts)                     | 7.5  | 2.3E-06 |
| <b>IYO_012145</b> | biopolymer transporter TolR               | 7.5  | 0.01418 |
| <b>IYO_003315</b> | metal ABC transporter ATPase              | 7.5  | 7.5E-14 |
| <b>IYO_028380</b> | type III chaperone protein ShcA           | 7.5  | 3.6E-07 |
| <b>IYO_000385</b> | dodecin flavoprotein                      | 7.5  | 1.5E-06 |
| <b>IYO_006845</b> | type III secretion system protein         | 7.4  | 4.1E-10 |
| <b>IYO_023505</b> | chemotaxis protein                        | 7.2  | 1.2E-07 |

|                   |                                                               |     |         |
|-------------------|---------------------------------------------------------------|-----|---------|
| <b>IYO_014240</b> | hypothetical                                                  | 7.2 | 4.7E-09 |
| <b>IYO_028540</b> | NAD(P) transhydrogenase                                       | 7.0 | 0.07674 |
| <b>IYO_003680</b> | HopAF1                                                        | 7.0 | 9.5E-10 |
| <b>IYO_001870</b> | hypothetical protein                                          | 6.8 | 1.8E-12 |
| <b>IYO_005855</b> | UDP-N-acetylglucosamine 2-epimerase                           | 6.8 | 6.1E-13 |
| <b>IYO_013690</b> | membrane protein                                              | 6.7 | 2.4E-07 |
| <b>IYO_010630</b> | thiamine biosynthesis protein ApbE                            | 6.6 | 7.4E-14 |
| <b>IYO_011020</b> | chemotaxis protein                                            | 6.4 | 7.1E-13 |
| <b>IYO_023390</b> | biopolymer transporter ExbB                                   | 6.4 | 0.0044  |
| <b>IYO_029045</b> | HopZ3                                                         | 6.3 | 1.6E-09 |
| <b>IYO_024520</b> | voltage-gated chloride channel protein                        | 5.9 | 1.1E-05 |
| <b>IYO_009335</b> | Fe-S oxidoreductase                                           | 5.8 | 0.02136 |
| <b>IYO_024535</b> | hypothetical protein                                          | 5.8 | 0.00527 |
| <b>IYO_004060</b> | hypothetical protein                                          | 5.7 | 7.8E-27 |
| <b>IYO_021665</b> | MFS transporter                                               | 5.7 | 0.00017 |
| <b>IYO_016185</b> | UDP-4-amino-4-deoxy-L-arabinose-oxoglutarate aminotransferase | 5.5 | 1.7E-05 |
| <b>IYO_020420</b> | iron ABC transporter permease                                 | 5.5 | 1.9E-16 |
| <b>IYO_022135</b> | InaA protein                                                  | 5.5 | 3.1E-08 |
| <b>IYO_007455</b> | membrane protein                                              | 5.3 | 1.3E-13 |
| <b>IYO_016195</b> | UDP-4-amino-4-deoxy-L-arabinose formyltransferase             | 5.3 | 3.8E-08 |
| <b>IYO_022030</b> | ACP phosphodiesterase                                         | 5.2 | 5.5E-09 |
| <b>IYO_006775</b> | lytic transglycosylase                                        | 5.2 | 1.4E-13 |

|                   |                                 |     |         |
|-------------------|---------------------------------|-----|---------|
| <b>IYO_012605</b> | fusaric acid resistance protein | 5.2 | 4.7E-05 |
| <b>IYO_018725</b> | membrane protein                | 5.1 | 0.00024 |
| <b>IYO_004240</b> | hypothetical protein            | 5.0 | 6E-05   |
| <b>IYO_014250</b> | chemotaxis protein CheY         | 5.0 | 0.10469 |

920  
921  
922

923 **Additional file 5:**

924 Expression levels of individual *Psa* effectors over the infection time course. Effectors are  
 925 ranked by the highest level of expression between 3 and 12 hours post infection (HPI) in  
 926 reads per kilobase per million (RPKM). Effectors likely to be disrupted or pseudogenes  
 927 were not included (docx).  
 928

| RPKM       |          |                |                 |         |        |        |        |        |        |        |        |         |
|------------|----------|----------------|-----------------|---------|--------|--------|--------|--------|--------|--------|--------|---------|
| Gene ID    | Effector | Heat map group | <i>in vitro</i> | 1.5 HPI | 3 HPI  | 6 HPI  | 12 HPI | 24 HPI | 48 HPI | 72 HPI | 96 HPI | 120 HPI |
| IYO_029795 | HopAU1   | 11             | 346.4           | 970.6   | 3772.5 | 2876.6 | 3196.1 | 2141.7 | 1138.8 | 952.1  | 619.7  | 946.2   |
| IYO_008065 | AvrRpm1  | 11             | 123.9           | 365.5   | 1293.2 | 867.8  | 1415.6 | 940.2  | 538.8  | 542.9  | 526.2  | 693.6   |
| IYO_020425 | AvrPto5  | 11             | 58.8            | 331     | 1198.8 | 920.8  | 1368.6 | 770.7  | 472.4  | 424.3  | 281.7  | 487.2   |
| IYO_018555 | HopAZ1   | 11             | 102.1           | 226.8   | 995    | 616.3  | 1320.1 | 1178.3 | 479.8  | 682.5  | 464.8  | 788     |
| IYO_004052 | HopS2    | 11             | 15              | 181.7   | 1145.3 | 751.5  | 762.2  | 494.6  | 324.2  | 239.9  | 129    | 226.5   |
| IYO_003720 | HopAO2   | 11             | 102.7           | 346.6   | 1102.7 | 664.4  | 821.5  | 560.7  | 357.2  | 378.4  | 228.5  | 356.7   |
| IYO_003600 | AvrB4    | 11             | 65.6            | 326.8   | 925.5  | 696.7  | 1015.7 | 621.4  | 332.6  | 431.6  | 251.2  | 465.3   |
| IYO_013150 | HopBN1   | 11             | 105.3           | 179.4   | 633    | 468.2  | 843.7  | 622.5  | 327.7  | 440.3  | 232.6  | 342.3   |
| IYO_008282 | HopZ5    | 11             | 43.4            | 314.1   | 662.1  | 546.9  | 727.8  | 426.2  | 222    | 186.1  | 141.9  | 440.9   |
| IYO_003570 | avrD1    | 6              | 38.2            | 99.4    | 432.1  | 412.6  | 687.1  | 492.6  | 240.1  | 419.9  | 264.3  | 703.8   |
| IYO_024217 | HopF2    | 11             | 187.9           | 225.4   | 658.8  | 479.4  | 649.8  | 563.5  | 288    | 400.6  | 213.4  | 403     |
| IYO_003657 | HopAW1   | 11             | 195             | 166.1   | 401.6  | 375.5  | 539    | 402.8  | 208.9  | 254.2  | 187    | 361.9   |
| IYO_006735 | HopN1    | 7              | 200.4           | 301.6   | 380.7  | 510.9  | 478.6  | 467.8  | 383.2  | 394.1  | 347.3  | 314.1   |
| IYO_008285 | HopH1    | 11             | 43.1            | 147.6   | 493.5  | 241.2  | 462.3  | 284.1  | 135.7  | 158.6  | 80.9   | 177.6   |
| IYO_000845 | HopY1    | 11             | 42.8            | 121.7   | 426.6  | 279.2  | 459.5  | 317    | 172.9  | 238.8  | 115.9  | 204.8   |
| IYO_005160 | HopI1    | 11             | 22.3            | 96.9    | 370    | 246.3  | 367    | 324.7  | 169.6  | 217.6  | 143.6  | 181.2   |
| IYO_006760 | HopM1    | 11             | 20.3            | 106.4   | 368.9  | 286.3  | 347.5  | 186.1  | 98.1   | 102.9  | 69.2   | 114.3   |
| IYO_003727 | HopBB1-1 | 11             | 47.3            | 103.6   | 362.9  | 266.3  | 232.3  | 173.2  | 76.2   | 107    | 143.6  | 100.6   |
| IYO_003680 | HopAF1   | 6              | 46              | 90.6    | 176.3  | 145.4  | 302.4  | 321.1  | 145.9  | 186.5  | 154.3  | 213.1   |

|            |          |    |      |       |       |       |       |       |       |       |       |       |
|------------|----------|----|------|-------|-------|-------|-------|-------|-------|-------|-------|-------|
| IYO_029045 | HopZ3    | 11 | 47.3 | 89.7  | 248.7 | 179.1 | 300.1 | 206.6 | 111.2 | 116.5 | 84.1  | 135.8 |
| IYO_006770 | AvrE1    | 11 | 27   | 73.9  | 291.1 | 176.3 | 164.6 | 129.1 | 57.6  | 53.6  | 44.9  | 47.8  |
| IYO_003525 | HopQ1    | 11 | 53.6 | 96.9  | 165   | 163.3 | 232.5 | 146.8 | 86.5  | 131.6 | 79.6  | 168.7 |
| IYO_003530 | HopD1    | 7  | 53.5 | 99.3  | 212.3 | 184   | 229.5 | 216.6 | 156.4 | 170.4 | 124.3 | 156.3 |
| IYO_024150 | HopR1    | 11 | 24.1 | 58.5  | 217.6 | 103   | 94    | 68.1  | 77.2  | 112.8 | 45.6  | 94.9  |
| IYO_012225 | HopAE1   | 11 | 31.2 | 53.1  | 133.8 | 95.1  | 142.7 | 174.9 | 115.4 | 111.7 | 71.9  | 121.5 |
| IYO_003675 | HopBB1-2 | 6  | 32.1 | 40.7  | 129.6 | 67.4  | 148.5 | 104.5 | 55.6  | 50.1  | 21.9  | 136.4 |
| IYO_027420 | HopAS1   | 9  | 24.9 | 11.4  | 12.3  | 17.1  | 21.7  | 60.3  | 129.9 | 109.4 | 38.4  | 53.4  |
| IYO_023985 | HopAH1   | 1  | 53.5 | 111.4 | 111.3 | 110.1 | 81.9  | 93.5  | 70.5  | 82.1  | 57.6  | 42.3  |
| IYO_006745 | HopAA1-1 | 11 | 9.2  | 27.7  | 107.2 | 60.6  | 109.3 | 80.5  | 32.5  | 27.7  | 12.8  | 31    |
| IYO_003635 | HopX3*   | 5  | 53.1 | 93.4  | 67.9  | 70.6  | 65.6  | 33.7  | 63.6  | 107.1 | 59.7  | 88.2  |
| IYO_023205 | HopAM1-1 | ND |      |       |       |       |       |       |       |       |       |       |
| IYO_008385 | HopAM1-2 | ND |      |       |       |       |       |       |       |       |       |       |

929

930

931

932

933



934 **Additional file 6:**

935 Expression of non-effector genes with upstream HrpL boxes. Genes are ranked by the  
936 ration of expression at 12 hours post infection (HPI) compared with *in vitro* expression  
937 (docx).

938

| Gene ID    | Gene Annotation                       | Cluster | 12 HPI/ <i>in vitro</i> | P-value  |
|------------|---------------------------------------|---------|-------------------------|----------|
| IYO_002060 | IAA lysine ligase                     | 11      | 36.0                    | 6.20E-17 |
| IYO_006775 | lytic transglycosylase                | 11      | 5.2                     | 5.56E-11 |
| IYO_010630 | thiamine biosynthesis protein<br>ApbE | 11      | 5                       | 5.79E-14 |
| IYO_027210 | peptidase M20                         | 11      | 3.5                     | 1.16E-05 |
| IYO_025425 | phosphatidylserine<br>decarboxylase   | 11      | 3.4                     | 1.27E-01 |
| IYO_002055 | multidrug transporter Mate            | 7       | 2.5                     | 1.42E-02 |
| IYO_000225 | AraC transcription factor             | 8       | 1.5                     | 2.89E-01 |
| IYO_008215 | Transporter                           | 1       | 1.2                     | 3.33E-01 |

939

940

941

942

943 **Additional file 7:**

944 Genes expressed in the mid phase of infection that do not encode the T3SS or T3SEs.

945 Effectors were ranked by the highest level of expression between 3 and 24 HPI compared

946 with *in vitro* (cutoff 5-fold) (docx).

947

| Gene ID    | Gene Annotation                               | Max 3-24hr/ <i>in vitro</i> | P-value |
|------------|-----------------------------------------------|-----------------------------|---------|
| IYO_022020 | hemolysin                                     | 176.8965134                 | 9.7E-44 |
| IYO_012110 | Ais protein                                   | 52.15177309                 | 6.6E-21 |
| IYO_022025 | glycerol acyltransferase                      | 47.41414785                 | 4E-16   |
| IYO_002060 | IAA lysine ligase                             | 46.43964929                 | 6.2E-20 |
| IYO_006830 | secretin                                      | 44.12981547                 | 1E-37   |
| IYO_028770 | LysR family transcriptional regulator         | 44.1000272                  | 4.7E-25 |
| IYO_003325 | copper resistance protein CopZ                | 41.36623134                 | 8.7E-27 |
| IYO_012005 | phosphate ABC transporter permease            | 37.70442846                 | 3.1E-32 |
| IYO_028960 | sulfonate ABC transporter permease            | 35.71674044                 | 1.4E-12 |
| IYO_006420 | chemotaxis protein                            | 35.6663794                  | 4.3E-25 |
| IYO_014395 | lytic transglycosylase                        | 31.15779288                 | 4.2E-24 |
| IYO_014235 | hypothetical protein                          | 30.42819287                 | 4.3E-21 |
| IYO_028955 | nitrate ABC transporter ATP-binding protein   | 28.30708753                 | 4.5E-08 |
| IYO_005735 | glycoside hydrolase                           | 25.83644908                 | 1.2E-24 |
| IYO_006885 | ATP synthase                                  | 21.27236361                 | 1.6E-21 |
| IYO_014245 | membrane protein                              | 17.92814971                 | 0.01651 |
| IYO_009200 | hypothetical protein                          | 16.75685698                 | 4.7E-16 |
| IYO_012125 | diguanylate cyclase                           | 16.10227356                 | 2.4E-19 |
| IYO_022140 | SAM-dependent methyltransferase               | 14.56526101                 | 3E-23   |
| IYO_012120 | AraC family transcriptional regulator         | 13.86039793                 | 9.3E-12 |
| IYO_002045 | hypothetical protein                          | 13.78948606                 | 5.1E-05 |
| IYO_017375 | phosphonate/organophosphate ester transporter | 13.19762412                 | 9.7E-09 |

|            |                                        |             |         |
|------------|----------------------------------------|-------------|---------|
|            | subunit                                |             |         |
| IYO_012115 | XRE family transcriptional regulator   | 12.15821469 | 7.3E-21 |
| IYO_028535 | NADP transhydrogenase subunit alpha    | 11.6258924  | 6.2E-09 |
| IYO_010805 | LuxR family transcriptional regulator  | 11.35613537 | 2.7E-09 |
| IYO_012140 | protein tolQ                           | 10.24591846 | 2.9E-05 |
| IYO_022695 | alkaline phosphatase                   | 10.1825476  | 3.4E-13 |
| IYO_006250 | tail protein                           | 10.12427557 | 2.1E-20 |
| IYO_027360 | transcriptional initiation protein Tat | 9.73508113  | 1.7E-11 |
| IYO_009265 | serine/threonine protein phosphatase   | 9.394839603 | 4.2E-08 |
| IYO_016255 | Ais protein                            | 9.226696251 | 3.8E-09 |
| IYO_023400 | energy transducer TonB                 | 8.931602714 | 0.00019 |
| IYO_009660 | hypothetical protein                   | 8.858717065 | 0.00138 |
| IYO_027435 | DNA polymerase III subunit epsilon     | 8.414824567 | 4E-08   |
| IYO_012610 | MarR family transcriptional regulator  | 8.394245239 | 6.1E-05 |
| IYO_002040 | hypothetical protein                   | 7.97028053  | 0.00434 |
| IYO_012030 | nitrite reductase                      | 7.725691653 | 0.00011 |
| IYO_012145 | biopolymer transporter TolR            | 7.522804764 | 0.01832 |
| IYO_003315 | metal ABC transporter ATPase           | 7.519255209 | 7.5E-14 |
| IYO_000385 | dodecin flavoprotein                   | 7.463415413 | 1.5E-06 |
| IYO_023505 | chemotaxis protein                     | 7.205132932 | 1.2E-07 |
| IYO_014240 | hypothetical                           | 7.163653846 | 4.7E-09 |
| IYO_028540 | NAD(P) transhydrogenase                | 6.987308302 | 0.07674 |
| IYO_001870 | hypothetical protein                   | 6.828648569 | 1.8E-12 |
| IYO_005855 | UDP-N-acetylglucosamine 2-epimerase    | 6.828589164 | 6.1E-13 |
| IYO_013690 | membrane protein                       | 6.663626577 | 2.4E-07 |
| IYO_010630 | thiamine biosynthesis protein ApbE     | 6.594972584 | 7.4E-14 |
| IYO_011020 | chemotaxis protein                     | 6.419561085 | 7.1E-13 |
| IYO_023390 | biopolymer transporter ExbB            | 6.37203283  | 0.0044  |

|                   |                                                                  |             |         |
|-------------------|------------------------------------------------------------------|-------------|---------|
| <b>IYO_024520</b> | voltage-gated chloride channel protein                           | 5.859449978 | 1.1E-05 |
| <b>IYO_009335</b> | Fe-S oxidoreductase                                              | 5.832304804 | 0.01462 |
| <b>IYO_024535</b> | hypothetical protein                                             | 5.789314032 | 0.00527 |
| <b>IYO_004060</b> | hypothetical protein                                             | 5.695280181 | 7.8E-27 |
| <b>IYO_021665</b> | MFS transporter                                                  | 5.684151414 | 0.00017 |
| <b>IYO_016185</b> | UDP-4-amino-4-deoxy-L-arabinose-oxoglutarate<br>aminotransferase | 5.505631007 | 1.7E-05 |
| <b>IYO_020420</b> | iron ABC transporter permease                                    | 5.488234589 | 1.9E-16 |
| <b>IYO_022135</b> | InaA protein                                                     | 5.460963656 | 3.1E-08 |
| <b>IYO_007455</b> | membrane protein                                                 | 5.347108089 | 1.3E-13 |
| <b>IYO_016195</b> | UDP-4-amino-4-deoxy-L-arabinose formyltransferase                | 5.310883424 | 3.8E-08 |
| <b>IYO_022030</b> | ACP phosphodiesterase                                            | 5.183953282 | 5.5E-09 |
| <b>IYO_006775</b> | lytic transglycosylase                                           | 5.161048509 | 1.4E-13 |
| <b>IYO_012605</b> | fusaric acid resistance protein                                  | 5.150295806 | 4.7E-05 |
| <b>IYO_018725</b> | membrane protein                                                 | 5.138633214 | 0.00024 |
| <b>IYO_004240</b> | hypothetical protein                                             | 4.992962804 | 6E-05   |
| <b>IYO_014250</b> | chemotaxis protein CheY                                          | 4.96231316  | 0.10469 |

948  
949  
950

951 **Additional file 8:**

952 Genes upregulated late in the time course. Genes were ranked based on the ratio of  
 953 expression at 120 hours post infection (HPI) compared with 1.5 HPI (docx).

954

| Gene ID    | Gene Annotation                                    | 120HPI<br>RPKM/1.5 HPI<br>RPKM | P-value  |
|------------|----------------------------------------------------|--------------------------------|----------|
| IYO_016130 | ABC transporter                                    | 119.9                          | 6.92E-05 |
| IYO_016135 | acyl-CoA synthetase                                | 93.1                           | 7.11E-06 |
| IYO_006065 | glycosyl transferase                               | 75.6                           | 4.34E-08 |
| IYO_013825 | alkanesulfonate monooxygenase                      | 51.2                           | 4.06E-15 |
| IYO_006070 | GDP-mannose dehydrogenase                          | 51.1                           | 7.92E-40 |
| IYO_009605 | Yqcl/YcgG family protein                           | 39.1                           | 8.72E-07 |
| IYO_023405 | biopolymer transporter ExbD                        | 34.3                           | 6.02E-05 |
| IYO_026605 | monooxygenase                                      | 33.2                           | 2.77E-11 |
| IYO_017250 | energy transducer TonB                             | 28.3                           | 2.71E-08 |
| IYO_017245 | biopolymer transporter ExbB                        | 28.0                           | 5.43E-07 |
| IYO_027905 | transporter                                        | 26.9                           | 3.73E-10 |
| IYO_016105 | acyl-CoA dehydrogenase                             | 24.8                           | 1.23E-07 |
| IYO_005580 | hypothetical protein                               | 24.2                           | 2.93E-12 |
| IYO_027910 | aliphatic sulfonates transport ATP-binding subunit | 23.7                           | 5.36E-06 |
| IYO_006055 | alginate biosynthesis protein                      | 22.7                           | 2.51E-06 |
| IYO_006050 | alginate regulatory protein                        | 20.0                           | 6.29E-08 |
| IYO_009255 | sulfonate ABC transporter ATP-binding protein      | 19.9                           | 8.75E-03 |
| IYO_006015 | mannose-1-phosphate guanylyltransferase            | 19.3                           | 1.91E-22 |
| IYO_018210 | calcium-binding protein                            | 19.2                           | 2.34E-16 |
| IYO_008315 | lipoprotein                                        | 18.3                           | 8.74E-18 |
| IYO_016100 | acyl-CoA dehydrogenase                             | 18.2                           | 1.37E-03 |
| IYO_016120 | ABC transporter permease                           | 16.7                           | 7.26E-03 |

|            |                                                      |      |          |
|------------|------------------------------------------------------|------|----------|
| IYO_026615 | N5,N10-methylene tetrahydromethanopterin reductase   | 16.5 | 3.86E-07 |
| IYO_015950 | polar amino acid ABC transporter permease            | 15.6 | 3.90E-02 |
| IYO_006060 | hemolysin D                                          | 15.3 | 5.79E-11 |
| IYO_006040 | alginate O-acetyltransferase                         | 15.1 | 1.94E-09 |
| IYO_026620 | methionine ABC transporter substrate-binding protein | 15.0 | 1.95E-03 |
| IYO_026625 | ABC transporter                                      | 15.0 | 6.50E-07 |
| IYO_027920 | ABC transporter substrate-binding protein            | 14.1 | 2.03E-09 |
| IYO_015300 | ABC transporter permease                             | 13.1 | 3.01E-03 |
| IYO_026675 | sulfonate ABC transporter ATP-binding protein        | 12.7 | 2.93E-04 |
| IYO_006030 | poly(beta-D-mannuronate) O-acetylase                 | 12.3 | 2.14E-09 |
| IYO_011010 | catalase                                             | 12.0 | 4.25E-14 |
| IYO_016095 | 5,10-methylene tetrahydromethanopterin reductase     | 11.7 | 2.57E-07 |
| IYO_014785 | sugar ABC transporter                                | 11.4 | 1.52E-06 |
| IYO_026610 | acyl-CoA dehydrogenase                               | 11.0 | 1.56E-05 |
| IYO_006025 | alginate O-acetyltransferase                         | 11.0 | 1.43E-07 |
| IYO_012440 | hypothetical protein                                 | 10.7 | 1.66E-02 |
| IYO_020560 | peptidase M4                                         | 10.4 | 3.46E-09 |
| IYO_011310 | NAD(P)H-dependent FMN reductase                      | 10.2 | 9.59E-06 |
| IYO_024090 | porin                                                | 10.1 | 1.15E-08 |
| IYO_003290 | hypothetical protein                                 | 10.0 | 9.64E-02 |
| IYO_010385 | lipoprotein                                          | 10.0 | 1.85E-02 |
| IYO_027985 | hypothetical protein                                 | 9.8  | 1.90E-07 |
| IYO_006045 | poly(beta-D-mannuronate) C5 epimerase                | 9.6  | 1.11E-09 |
| IYO_006035 | poly(beta-D-mannuronate) lyase                       | 9.6  | 4.76E-11 |
| IYO_014780 | sugar ABC transporter substrate-binding protein      | 9.5  | 1.68E-06 |
| IYO_016140 | monooxygenase                                        | 9.1  | 1.75E-06 |
| IYO_017240 | biopolymer transporter ExbD                          | 9.1  | 1.69E-05 |

|            |                                                               |     |          |
|------------|---------------------------------------------------------------|-----|----------|
| IYO_011305 | lysine transporter LysE                                       | 8.7 | 8.38E-05 |
| IYO_001790 | taurine transporter ATP-binding subunit                       | 8.7 | 6.15E-02 |
| IYO_026775 | alpha/beta hydrolase                                          | 8.6 | 1.81E-07 |
| IYO_024095 | ABC transporter substrate-binding protein                     | 8.5 | 6.24E-08 |
| IYO_027980 | ABC transporter permease                                      | 8.1 | 6.65E-12 |
| IYO_026630 | ABC transporter permease                                      | 7.8 | 2.58E-02 |
| IYO_001460 | prophage PssSM-01                                             | 7.7 | 2.51E-03 |
| IYO_011840 | hemolysin D                                                   | 7.7 | 2.28E-03 |
| IYO_013055 | aldolase                                                      | 7.4 | 1.26E-04 |
| IYO_026680 | taurine dioxygenase                                           | 7.2 | 9.94E-08 |
| IYO_014465 | hypothetical protein                                          | 6.9 | 1.11E-09 |
| IYO_014710 | lipoprotein                                                   | 6.8 | 7.90E-09 |
| IYO_017510 | lipoprotein                                                   | 6.8 | 1.75E-01 |
| IYO_001820 | hypothetical protein                                          | 6.8 | 4.01E-02 |
| IYO_027915 | alkanesulfonate transporter permease subunit                  | 6.7 | 2.33E-04 |
| IYO_016110 | branched-chain amino acid ABC transporter ATP-binding protein | 6.6 | 4.90E-03 |
| IYO_009290 | LTXQ domain-containing protein                                | 6.6 | 1.85E-15 |
| IYO_006935 | hypothetical protein                                          | 6.5 | 2.86E-08 |
| IYO_016115 | ABC transporter permease                                      | 6.3 | 8.18E-05 |
| IYO_009230 | sulfurtransferase                                             | 6.1 | 2.96E-04 |
| IYO_013050 | nitrate ABC transporter substrate-binding protein             | 6.0 | 2.86E-02 |
| IYO_020620 | hypothetical protein                                          | 5.8 | 2.46E-05 |
| IYO_011220 | Fis family transcriptional regulator                          | 5.8 | 2.93E-06 |
| IYO_029660 | coenzyme F390 synthetase (plasmid)                            | 5.6 | 1.54E-01 |
| IYO_027965 | sulfate ABC transporter ATP-binding protein                   | 5.4 | 7.96E-04 |
| IYO_005875 | hypothetical protein                                          | 5.4 | 7.26E-14 |
| IYO_016125 | ABC transporter permease                                      | 5.4 | 7.52E-02 |

|                   |                          |     |          |
|-------------------|--------------------------|-----|----------|
| <b>IYO_001465</b> | prophage PssSM-01        | 5.3 | 1.02E-04 |
| <b>IYO_011375</b> | class V aminotransferase | 5.3 | 4.08E-06 |
| <b>IYO_009250</b> | ABC transporter permease | 5.3 | 1.92E-01 |
| <b>IYO_001810</b> | ribonucleotide reductase | 5.2 | 1.16E-14 |
| <b>IYO_004495</b> | hypothetical protein     | 5.1 | 9.88E-03 |
| <b>IYO_001805</b> | transposase              | 5.1 | 3.42E-06 |
| <b>IYO_028000</b> | diguanylate cyclase      | 5.0 | 3.01E-06 |
| <b>IYO_009615</b> | serine dehydratase       | 5.0 | 1.85E-07 |

955

956



957 **Additional file 9:**

958 Expression levels of secondary metabolite gene clusters. Means of reads per kilobase  
 959 per million (RPKM) for each gene across all time points with standard deviations (docx).

960

| Secondary metabolite pathway                  | Function                              | Gene members      | Induction levels <i>in planta</i>                                    |
|-----------------------------------------------|---------------------------------------|-------------------|----------------------------------------------------------------------|
| <b>Novel Non-ribosomal peptide synthetase</b> | unknown                               | IYO_003775-003830 | Constitutive expression <i>in planta</i><br>(average RPKM 67 +/- 43) |
| <b>Pyoverdine</b>                             | Iron chelation                        | IYO_010820-010910 | Constitutive expression <i>in planta</i><br>(average RPKM 41 +/- 43) |
| <b>Achromobactin</b>                          | Iron chelation                        | IYO_013460-013515 | Constitutive expression <i>in planta</i><br>(average RPKM 17 +/- 9)  |
| <b>Yersiniabactin</b>                         | Iron chelation                        | IYO_013840-013910 | Constitutive expression <i>in planta</i><br>(average RPKM 15 +/-19)  |
| <b>Unknown</b>                                | unknown                               | IYO_026725-026760 | Weak constitutive <i>in planta</i> (expression<br>48 +/-16 RPKM)     |
| <b>Mangotoxin</b>                             | Inhibitor of ornithine<br>deacetylase | IYO_028470-028715 | Weak expressed <i>in planta</i> (average<br>RPKM 13 +/- 9)           |
| <b>Plasmid-borne pathway</b>                  | unknown                               | IYO_029645-029685 | Induced late <i>in planta</i> (see figure 5)                         |

961

962 **Additional file 10:**

963 Reads per kilobase per million (RPKM) values of genes encoding proteins predicted to be secreted via T2SS (docx).

964

| # ID       | Function                                                            | Phase | <i>in vitro</i> | 1.5 HPI | 3 HPI  | 12 HPI | 24 HPI | 8 HPI  | 72 HPI | 96 HPI | 120 HPI |
|------------|---------------------------------------------------------------------|-------|-----------------|---------|--------|--------|--------|--------|--------|--------|---------|
| IYO_011995 | phosphate ABC transporter substrate-binding protein                 | Early | 39.5            | 3366.6  | 5876.1 | 3269.3 | 2774.8 | 1220.1 | 1143.4 | 1114.5 | 1774.3  |
| IYO_019585 | thioredoxin                                                         | Early | 59.4            | 1525.9  | 1863.2 | 983.2  | 433.9  | 374.4  | 329.6  | 350.7  | 469.3   |
| IYO_027385 | ABC transporter substrate-binding protein                           | Early | 10.4            | 222.5   | 306.4  | 105.9  | 117.6  | 54.4   | 68.2   | 7.9    | 58.9    |
| IYO_006115 | amino acid ABC transporter substrate-binding protein                | Early | 117.7           | 3408.6  | 2742.5 | 843.8  | 829.8  | 596.2  | 750.2  | 622.4  | 722.3   |
| IYO_028665 | phosphate-binding protein                                           | Early | 33.6            | 759.5   | 683.8  | 278.3  | 194.3  | 145.9  | 138.5  | 166.4  | 210.9   |
| IYO_000970 | ammonia channel protein                                             | Early | 43.5            | 1336.6  | 811.4  | 274.2  | 268.1  | 231.2  | 409.6  | 259.8  | 426.5   |
| IYO_021410 | short-chain dehydrogenase                                           | Early | 6.6             | 142.6   | 113.3  | 26.3   | 33.4   | 19.3   | 4.4    | 19.6   | 12.1    |
| IYO_010675 | phosphatase                                                         | Early | 32.6            | 228.2   | 410.1  | 158.8  | 97.9   | 151.1  | 56.9   | 80.3   | 89.7    |
| IYO_021050 | ABC transporter substrate-binding protein                           | Early | 55.0            | 945.8   | 685.8  | 281.4  | 281.5  | 212.0  | 245.3  | 245.3  | 224.0   |
| IYO_020035 | ABC transporter substrate-binding protein                           | Early | 131.3           | 1169.0  | 1415.7 | 583.5  | 416.4  | 253.4  | 327.7  | 249.7  | 292.0   |
| IYO_014740 | sugar ABC transporter substrate-binding protein                     | Early | 59.2            | 490.2   | 604.3  | 243.3  | 163.4  | 143.6  | 89.5   | 131.6  | 96.6    |
| IYO_020310 | hypothetical protein                                                | Early | 24.9            | 380.2   | 242.5  | 139.5  | 139.0  | 187.8  | 112.7  | 43.1   | 75.4    |
| IYO_004585 | branched-chain amino acid ABC transporter substrate-binding protein | Early | 87.8            | 956.2   | 489.1  | 174.2  | 232.2  | 130.6  | 255.0  | 172.8  | 338.3   |
| IYO_025190 | protein hupE                                                        | Early | 25.0            | 198.5   | 123.6  | 36.9   | 61.1   | 38.8   | 90.6   | 89.1   | 123.2   |

|                   |                                                           |       |        |        |        |         |         |         |         |         |         |
|-------------------|-----------------------------------------------------------|-------|--------|--------|--------|---------|---------|---------|---------|---------|---------|
| <b>IYO_006385</b> | porin                                                     | Early | 1383.7 | 7387.9 | 6833.1 | 1618.0  | 1721.0  | 1130.5  | 1055.6  | 984.5   | 945.0   |
| <b>IYO_020485</b> | glycine/betaine ABC transporter substrate-binding protein | Early | 33.5   | 134.6  | 129.0  | 35.6    | 46.6    | 43.4    | 44.4    | 37.1    | 32.5    |
| <b>IYO_008325</b> | polygalacturonase                                         | Early | 164.0  | 369.3  | 564.7  | 150.2   | 140.3   | 107.1   | 97.9    | 83.8    | 107.4   |
| <b>IYO_021455</b> | Methylamine utilization protein MauL                      | Early | 94.4   | 582.6  | 317.5  | 319.1   | 399.1   | 422.6   | 247.9   | 279.5   | 147.7   |
| <b>IYO_004580</b> | urea ABC transporter permease                             | Early | 14.9   | 74.3   | 43.4   | 20.5    | 16.3    | 35.5    | 30.8    | 19.4    | 22.0    |
| <b>IYO_026915</b> | amino acid ABC transporter substrate-binding protein      | Early | 50.4   | 426.4  | 139.6  | 38.5    | 65.7    | 44.0    | 87.4    | 35.9    | 98.4    |
| <b>IYO_006365</b> | sugar ABC transporter substrate-binding protein           | Early | 1316.7 | 2310.1 | 3559.7 | 671.4   | 762.4   | 398.4   | 474.9   | 375.7   | 335.4   |
| <b>IYO_024670</b> | hypothetical protein part of ICE                          | Early | 34.2   | 23.9   | 18.9   | 59.0    | 31.6    | 29.2    | 22.7    | 8.5     | 38.9    |
| <b>IYO_006805</b> | type III secretion protein                                | Mid   | 57.1   | 309.6  | 1263.6 | 1201.0  | 751.4   | 414.5   | 501.0   | 276.3   | 450.1   |
| <b>IYO_002045</b> | hypothetical protein                                      | Mid   | 73.0   | 63.8   | 30.4   | 1006.5  | 102.8   | 120.8   | 106.7   | 104.0   | 50.3    |
| <b>IYO_009660</b> | hypothetical protein                                      | Mid   | 31.6   | 11.5   | 0.0    | 280.3   | 84.6    | 121.0   | 73.3    | 66.4    | 81.0    |
| <b>IYO_002040</b> | hypothetical protein                                      | Mid   | 60.1   | 51.1   | 27.5   | 479.1   | 77.9    | 74.5    | 104.8   | 106.2   | 117.1   |
| <b>IYO_001870</b> | hypothetical protein                                      | Mid   | 510.6  | 318.1  | 478.1  | 2793.5  | 2242.8  | 1524.5  | 1518.2  | 1974.0  | 1162.6  |
| <b>IYO_006020</b> | alginate O-acetyltransferase                              | Mid   | 88.2   | 49.0   | 27.9   | 423.9   | 197.5   | 278.0   | 383.9   | 259.6   | 417.2   |
| <b>IYO_023395</b> | TonB-dependent receptor                                   | Mid   | 25.2   | 19.7   | 20.4   | 98.7    | 101.4   | 46.8    | 37.8    | 47.0    | 83.2    |
| <b>IYO_008760</b> | sorbosone dehydrogenase                                   | Mid   | 105.4  | 49.9   | 40.3   | 391.5   | 269.6   | 218.2   | 157.1   | 176.8   | 125.4   |
| <b>IYO_018720</b> | sorbosone dehydrogenase                                   | Mid   | 60.3   | 37.9   | 25.8   | 224.0   | 111.0   | 97.4    | 102.4   | 122.0   | 93.4    |
| <b>IYO_027210</b> | peptidase M20                                             | Mid   | 53.5   | 35.4   | 114.4  | 189.8   | 132.1   | 98.8    | 88.0    | 68.1    | 119.3   |
| <b>IYO_022715</b> | phospholipid-binding protein                              | Mid   | 8230.8 | 2550.5 | 2568.7 | 29098.2 | 18992.7 | 15528.5 | 13209.7 | 16287.6 | 10178.4 |

|                   |                                           |     |        |        |        |        |        |        |        |        |        |
|-------------------|-------------------------------------------|-----|--------|--------|--------|--------|--------|--------|--------|--------|--------|
| <b>IYO_004060</b> | hypothetical protein                      | Mid | 1959.4 | 7898.0 | 5063.3 | 6887.1 | 5478.9 | 4687.6 | 4501.3 | 3573.6 | 3898.1 |
| <b>IYO_019200</b> | BNR/Asp-box repeat-containing protein     | Mid | 56.0   | 117.1  | 157.2  | 196.2  | 133.8  | 88.1   | 59.6   | 80.2   | 66.9   |
| <b>IYO_004055</b> | membrane protein                          | Mid | 34.6   | 39.5   | 114.7  | 86.9   | 62.9   | 37.4   | 39.6   | 39.0   | 33.7   |
| <b>IYO_006835</b> | type III secretion protein                | Mid | 312.2  | 275.5  | 532.0  | 847.3  | 672.8  | 399.1  | 381.4  | 330.7  | 383.1  |
| <b>IYO_020600</b> | ABC transporter substrate-binding protein | Mid | 76.1   | 47.3   | 60.0   | 198.5  | 143.9  | 138.9  | 98.6   | 106.3  | 119.6  |
| <b>IYO_022515</b> | toluene tolerance protein                 | Mid | 116.7  | 73.1   | 109.9  | 251.8  | 129.2  | 148.1  | 174.9  | 121.3  | 128.6  |
| <b>IYO_006575</b> | superoxide dismutase                      | Mid | 178.1  | 46.6   | 35.6   | 375.8  | 202.9  | 114.6  | 173.8  | 176.6  | 223.3  |
| <b>IYO_022005</b> | hypothetical protein                      | Mid | 45.1   | 33.6   | 34.6   | 88.2   | 69.7   | 55.2   | 0.0    | 17.9   | 66.5   |
| <b>IYO_027595</b> | phosphorylcholine phosphatase             | Mid | 50.4   | 33.8   | 36.3   | 82.4   | 97.7   | 53.8   | 62.8   | 63.3   | 64.2   |
| <b>IYO_011990</b> | hypothetical protein                      | Mid | 1900.4 | 539.1  | 489.4  | 3491.9 | 1831.7 | 1693.3 | 1220.1 | 1023.3 | 836.5  |
| <b>IYO_027840</b> | ABC transporter substrate-binding protein | Mid | 70.8   | 93.0   | 65.3   | 56.8   | 99.4   | 36.2   | 24.1   | 37.9   | 42.6   |
| <b>IYO_017485</b> | hypothetical protein                      | Mid | 300.2  | 114.9  | 115.4  | 411.4  | 188.4  | 259.0  | 298.3  | 216.1  | 202.3  |
| <b>IYO_010560</b> | cytochrome C                              | Mid | 86.6   | 54.4   | 56.6   | 92.6   | 76.9   | 66.5   | 80.4   | 56.4   | 49.9   |
| <b>IYO_014770</b> | hypothetical protein                      | Mid | 208.1  | 169.6  | 157.6  | 200.6  | 190.5  | 206.4  | 197.7  | 172.8  | 410.9  |
| <b>IYO_011885</b> | type III effector                         | Mid | 25.2   | 6.4    | 3.6    | 7.2    | 7.8    | 8.5    | 6.0    | 3.4    | 2.9    |

965

966

967

968

969 **Additional file 11:**

970 RNA-seq experimental design. Three pottles, each with three plantlets, were inoculated  
971 for each time point. For RNA extraction, one plantlet from each pottle, was harvested and  
972 combined for each of three biological replicates (docx).

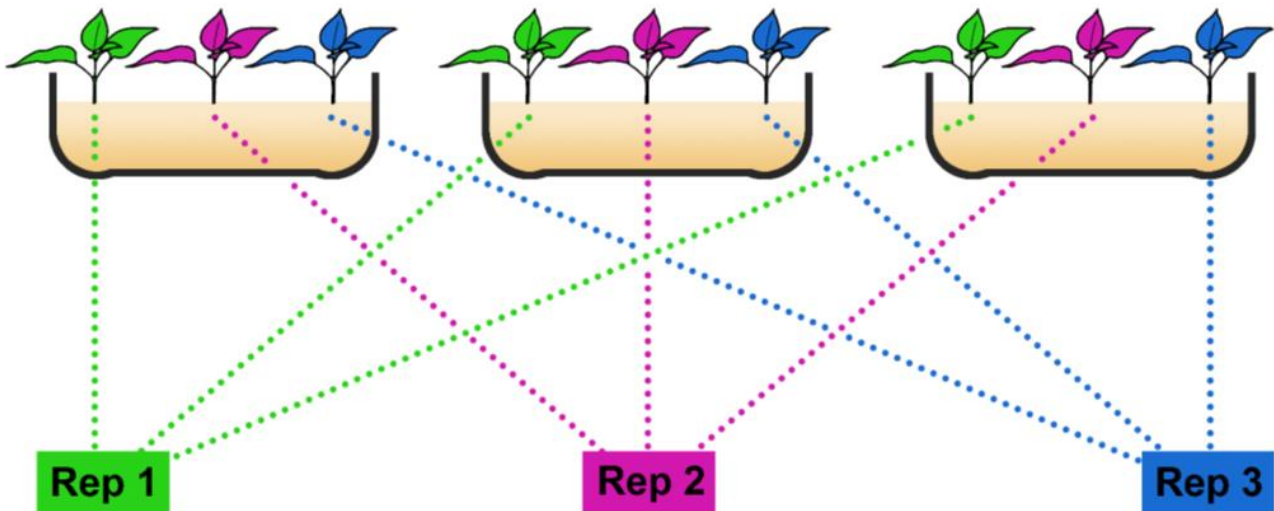

973

974 **Additional file 12:**

975 A bar plot of the inertia gain using the sum of the within-group variance with increasing  
976 cluster number (x-axis) produced using Hierarchical clustering on principal components  
977 (tiff).

978

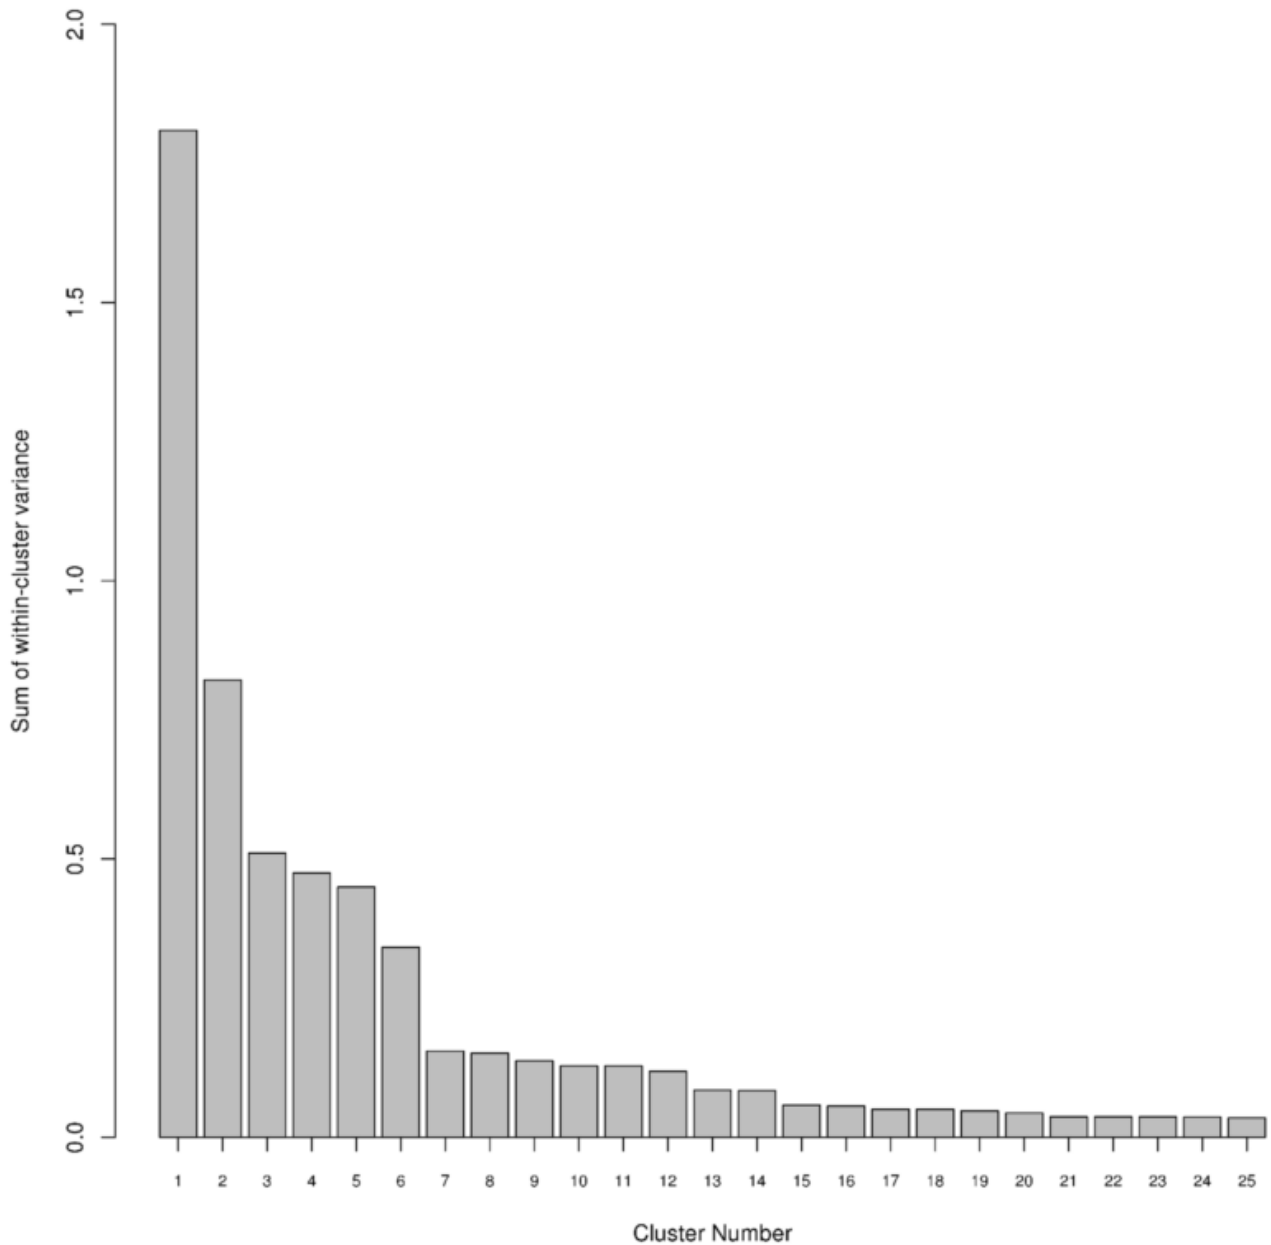

979

980

981 **Additional file 13:**

982 A spreadsheet containing all the primers used for reverse transcription and reverse  
983 transcription quantitative PCR. The data includes the gene chosen, locus ID number,  
984 primer sequences, product size and PCR efficiency (xlsx).
